1 **Parallel Concerted Evolution of Ribosomal Protein Genes in**  
2 **Fungi and Its Adaptive Significance**

3

4 Alison Mullis<sup>1#</sup>, Zhaolian Lu<sup>1#</sup>, Yu Zhan<sup>1#</sup>, Tzi-Yuan Wang<sup>2</sup>, Judith Rodriguez<sup>3</sup>, Ahmad  
5 Rajeh<sup>1,3</sup>, Ajay Chatrath<sup>1</sup>, Zhenguo Lin<sup>1\*</sup>

6

7 <sup>1</sup> Department of Biology, Saint Louis University, St. Louis, MO, USA 63103

8 <sup>2</sup> Biodiversity Research Center, Academia Sinica, Nankang, Taipei, Taiwan

9 <sup>3</sup> Program of Bioinformatics and Computational Biology, Saint Louis University, St.  
10 Louis, MO USA 63103

11

12

13 # These authors contributed equally to this work

14 \* To whom correspondence should be addressed

15 Zhenguo Lin, Email: [zhenguo.lin@slu.edu](mailto:zhenguo.lin@slu.edu)

16 Phone: 314-977-9816

17

18 Keywords: ribosomal proteins, gene duplication, gene conversion, concerted evolution, fermentation

## 19 **ABSTRACT**

20 Ribosomal proteins (RPs) genes encode structure components of ribosomes, the cellular  
21 machinery for protein synthesis. A single functional copy has been maintained in most of 78-80  
22 RP families in animals due to evolutionary constraints imposed by gene dosage balance. Some  
23 fungal species have maintained duplicate copies in most RP families. How the RP genes were  
24 duplicated and maintained in these fungal species, and their functional significance remains  
25 unresolved. To address these questions, we identified all RP genes from 295 fungi and inferred  
26 the timing and nature of gene duplication for all RP families. We found that massive duplications  
27 of RP genes have independently occurred by different mechanisms in three distantly related  
28 lineages. The RP duplicates in two of them, budding yeast and Mucoromycota, were mainly  
29 created by whole genome duplication (WGD) events. However, in fission yeasts, duplicate RP  
30 genes were likely generated by retroposition, which is unexpected considering their dosage  
31 sensitivity. The sequences of most RP paralogs in each species have been homogenized by  
32 repeated gene conversion, demonstrating parallel concerted evolution, which might have  
33 facilitated the retention of their duplicates. Transcriptomic data suggest that the duplication and  
34 retention of RP genes increased RP transcription abundance. Physiological data indicate that  
35 increased ribosome biogenesis allowed these organisms to rapidly consuming sugars through  
36 fermentation while maintaining high growth rates, providing selective advantages to these  
37 species in sugar-rich environments.

## 38 INTRODUCTION

39 Gene duplication has served as a driving force for the evolution of new phenotypic traits and  
40 contributed to adaptation of organisms to their specific niches (Ohno 1970; Sidow 1996).  
41 Duplicate genes are mainly generated by chromosome or whole genome duplication (WGD),  
42 unequal crossing-over, and retroposition (Zhang 2013). Similar to other types of mutations, only  
43 a small portion of duplicate genes can be eventually fixed in a population, and the survivors are  
44 usually advantageous to the organisms (Zhang 2003; Kondrashov and Kondrashov 2006).  
45 Highly diverse retention patterns of duplicate genes have been observed among gene families  
46 (Hahn, et al. 2005). For instance, tens to hundreds of odorant receptors (ORs) genes can be  
47 found in metazoan genomes (Sanchez-Gracia, et al. 2009). In contrast, many genes have been  
48 maintained as a single copy since the divergence of eukaryotes, such as the DNA repair genes  
49 RAD51, MSH2, and MLH1 (Lin, et al. 2006; Lin, et al. 2007; Zeng, et al. 2014).

50 Another notable example is the gene families encoding for cytosolic ribosomal proteins  
51 (RPs), which are the structural components of ribosomes. Ribosomes carry out one of the most  
52 fundamental processes of living systems by translating genetic information from mRNA into  
53 proteins. In eukaryotes, each ribosome consists of two subunits, the small and large subunit,  
54 which consist of 78-80 different RPs and four types of ribosomal RNAs (rRNA) (Wool 1979;  
55 Wimberly, et al. 2000). RP genes are highly conserved in all domains of life (Korobeinikova, et  
56 al. 2012). Each RP was found to have unique amino acid sequences with very limited to none  
57 similarities between each other. For most animals studied, only a single functional copy of RP  
58 gene is maintained in each family, although many processed pseudogenes may be found  
59 (Dudov and Perry 1984; Kuzumaki, et al. 1987; Kenmochi, et al. 1998). As structural  
60 components of the highly expressed macromolecular complex, the evolutionary constraints on  
61 duplicate RP genes was believed to be imposed by gene dosage balance (Birchler and Veitia  
62 2012). In plants, attributing to polyploidization or WGD events, multiple gene copies are usually  
63 present in each RP families in polyploid plants (Vision, et al. 2000; Barakat, et al. 2001). This is  
64 probably because all RP genes were duplicated simultaneously by WGD, allowing maintenance  
65 of balanced dosage among RPs (Birchler and Veitia 2012).

66 Similar to polyploid plants, most of RP families in the budding yeast *Saccharomyces*  
67 *cerevisiae* have duplicate copies due to the occurrence of a WGD (Wolfe and Shields 1997;  
68 Kellis, et al. 2004). Many RP paralogous genes in *S. cerevisiae* generated by WGD, or RP  
69 ohnologs, are more similar to each other than to their orthologous genes due to interlocus gene

70 conversion (Evangelisti and Conant 2010; Casola, et al. 2012). During a interlocus gene  
71 conversion, one gene serves as a DNA donor that replaces the sequences of its paralogous  
72 gene (Chen, et al. 2007). As a result, the sequences of paralogous genes have been  
73 homogenized, resulted in the ancient duplicate events to appear much more recent, which was  
74 called “concerted evolution” (Brown, et al. 1972). One of the best-known examples of concert  
75 evolution is the genes encoding RNA component of ribosomes, the rRNA genes, in both  
76 prokaryotes and eukaryotes (Arnheim, et al. 1980; Schlotterer and Tautz 1994; Blattner, et al.  
77 1997).

78 According to the Ribosomal Protein Gene Database (RPG) (Nakao, et al. 2004), three of ten  
79 fungal species listed have multiple gene copies in most RP families, including *S. cerevisiae*, a  
80 fission yeast *Schizosaccharomyces pombe*, and a pin mold *Rhizopus oryzae*. The duplicate RP  
81 genes in *R. oryzae* could be generated by a WGD event it is ancestor (Ma, et al. 2009),  
82 although it has not been systematically examined. In addition, most RP families have more than  
83 four gene copies, which cannot be explained by a single WGD. Unlike *S. cerevisiae* and *R.*  
84 *oryzae*, no WGD has been detected during the evolution of *Sch. pombe* (Rhind, et al. 2011),  
85 suggesting that each RP family might be duplicated independently by small scale duplication  
86 (SSDs) events. This observation is unexpected because the duplicate genes encoding  
87 macromolecules generated by SSDs are much less likely to survive because they are sensitive  
88 to gene dosage balance (Li, et al. 1996; Conant and Wolfe 2008). It remains an unexplored  
89 dimension about how RP genes have been duplicate and maintained in fungi, particularly in the  
90 fission yeast *Sch. pombe*.

91 The expression of RP genes has been thoroughly linked to growth and proliferation,  
92 reflecting their central role in the regulation of growth in yeast (Montagne, et al. 1999;  
93 Jorgensen, et al. 2002; Brauer, et al. 2008). In rapid growth yeast cells, ~50% of RNA  
94 polymerase II (Pol II) transcription initiation events are devoted to RP expression (Warner  
95 1999). Therefore, the duplication and retention of RP genes might have more functional impacts  
96 on these microorganisms than animals or plants. Like other types of mutations, the occurrence  
97 of gene duplication is largely due to scholastic events, but retention of duplicate genes have  
98 been mainly driven by natural selection (Panchy, et al. 2016). A better understanding of  
99 evolutionary fates of RP duplicate genes could offer new insights into how gene duplication  
100 produced adaptive solutions to microorganisms.

101 To better understand the evolutionary patterns of RP genes and their adaptive significance,  
102 we conducted systematic identification and evolutionary analyses of all RP families in all fungal  
103 species with well-annotated genomes. We searched for RP genes from 295 fungal species and  
104 identified independent duplications of most RP families in three distantly related fungal lineages.  
105 We inferred the timing and nature of gene duplication for each RP family in each fungal lineage.  
106 We found that a vast majority of RP paralogous genes have experienced repeated gene  
107 conversion events that have homogenized their sequences in each species. In aligning with  
108 integrative analyses of genomic, transcriptomic data and physiological data, we proposed that  
109 the massive duplication, retention and concerted evolution of RP genes have contributed to the  
110 evolution of fermentative lifestyle in fungal species. This study offers a classic example  
111 illustrating the mechanisms and adaptive significance of maintaining duplicate genes encoding  
112 macromolecules.

## 113 RESULTS

### 114 Massive duplications of RP genes found in three distantly related fungal lineages

115 To determine the prevalence of gene duplications in RP families in fungi, we first searched  
116 for RP homologous genes for all fungal species with NCBI Reference Sequence (RefSeq)  
117 protein data (Supplementary table 1). As of March 2019, 285 fungal species were annotated  
118 with RefSeq protein data, covering five of the seven fungal phyla. We conducted BLASTP  
119 searches against the 285 RefSeq protein datasets using amino acid sequences of RP genes  
120 from both *S. cerevisiae* and *Sch. pombe* as queries (see Methods and Materials). Based on  
121 BLASTP search results, we calculated the gene copy numbers in each RP family for every  
122 examined species, and the total number of RP families with duplicate copies (Supplementary  
123 table 1).

124 We considered a species with massive RP duplications if more than 50% ( $\geq 40$ ) of RP  
125 families have duplicate copies. Among the 285 fungi examined, only ten species meet the  
126 criterion of massive RP duplication. The ten species distributes in three distantly related fungal  
127 lineages: three in the class of Saccharomycetes (budding yeast), four in the class of  
128 Schizosaccharomycetes (fission yeast), and three in the phylum of Mucoromycota  
129 (Supplementary table 1). Although multiple hits of most CRP families were found in a budding  
130 yeast *Candida viswanathii*, because the assembly type of its genome is diploid, the two hits

131 found in most RP families are alleles instead of paralogous gene, it was not considered as  
132 massive RP duplication.

133 Because protein annotations of a genome could be incomplete or inaccurate, manual  
134 curation is required for a more accurate survey of RP repertoire. It is necessary to carry out a  
135 second-round identification of RP genes with manual curation, focusing on the three fungal  
136 lineages. We selected 24 species from the three fungal lineages, including the ten species with  
137 massive RP duplication. To provide a more even distribution of taxonomic groups in each  
138 lineage, we included ten other species whose genomic data are available in NCBI Whole  
139 Genome Shotgun (WGS), Yeast Gene Order Browser (YGOB) and JGI (Byrne and Wolfe 2005;  
140 Maguire, et al. 2013). In total, our second-round search examined 34 fungal species, which  
141 includes 23 Saccharomycetes species, five Taphrinomycotina species (including the four fission  
142 yeasts), and six Mucoromycota species (fig. 1, Supplementary table 2). The phylogenetic  
143 relationships of the 34 species were inferred using the amino acid sequences of the largest  
144 subunit of RNA Pol II proteins (Supplementary fig. 1). Including the 285 species analyzed in our  
145 first round analysis, we have examined a total number of 295 fungal genomes in the two rounds  
146 of RP gene searches, representing the largest scale of RP gene survey in fungi to our  
147 knowledge.

148 To manually curate RP repertoire in a genome, we performed both BLASTP and TBLASTN  
149 searches for each of the 34 fungal species. By comparing BLASTP and TBLASTN search  
150 results, we identified discrepancies in the number of RP genes and aligned regions. We found  
151 that many TBLASTN hits were not present in BLASTP searches, indicating the presence of  
152 unannotated RP genes. Thus, we have manually predicted 259 novel RP genes from 32 of the  
153 34 species. We also revised the annotations of open reading frame (ORF) for 95 RP genes. In  
154 total, we identified a total number of 3950 RP genes from the 34 fungal species (Supplementary  
155 tables 2 and 3).

156 We constructed maximum likelihood (ML) phylogenetic trees for each RP family (see  
157 Materials and Methods). Similar tree topologies were observed among RP families with  
158 duplicate copies (Supplementary File 1). For instances, two copies of RPL6 genes are present  
159 in all ten post-WGD budding yeasts and all four fission yeast species (fig. 2A). More copies of  
160 RPL6 genes are present in Mucoromycota species *Lobosporangium transversale*, *Phycomyces*  
161 *blakesleeanus*, *Rhizopus microspores*, and *Rhizopus delemar* (former name *R. oryzae*), which  
162 have 2, 4, 3, and 5 copies of RPL6 genes, respectively. According to the ML tree (fig. 2A), the

163 RPL6 genes are more closely related to their paralogous genes in each species, instead of their  
164 orthologous genes. Similar patterns are present in the RPS19 genes, which encode a ribosomal  
165 small subunit protein (fig. 2B). These tree topologies suggest that the RP genes have been  
166 independently duplicated in each species after their divergence from each other. However, at  
167 least in the post-WGD budding yeasts, it has been documented that RPL6 and RPS19 were  
168 generated by the WGD occurred prior to the divergence of *S. cerevisiae* and *Vanderwaltozyma*  
169 *polyspora* (Conant and Wolfe 2006). Therefore, the phylogenetic trees do not accurately depict  
170 the evolutionary history of RPL6 and RPS19 families in budding yeasts. It has been shown that  
171 RPL6 and RPS19 genes have experienced gene conversion during the evolution of *S.*  
172 *cerevisiae*, which explains the discrepancy between the tree topology and their duplication  
173 history in the budding yeast (Evangelisti and Conant 2010; Casola, et al. 2012). However, it is  
174 not known whether it is the same case in the fission yeast and Mucoromycota species, which  
175 requires accurate timing of duplication events in the two lineages.

176 Based on these cases, we cannot infer the evolutionary history of RP genes in fungi solely  
177 based on the topology of phylogenetic trees due to the possibility of gene conversion. It is  
178 necessary to carry out additional analyses to determine when gene duplication events have  
179 occurred. Because only a small number of species have experienced massive RP duplication in  
180 each of the three fungal lineages (fig. 1 and Supplementary table 2), the most parsimonious  
181 scenario is that the expansion of RP genes in each fungal lineage occurred independently. In  
182 our subsequent analyses, we separately inferred the timing and nature of gene duplications for  
183 each RP family and determined whether they have experienced gene conversion after gene  
184 duplication in each lineage.

## 185 **Duplication and concerted evolution of RP genes in the budding yeasts**

186 We manually identified all RP genes for the 23 Saccharomycetes species (budding yeasts).  
187 A total number of 59 RP families have duplicate copies in most WGD species (fig. 1 and  
188 Supplementary table 2). 55 of them are ohnologs generated by an ancestral WGD (Conant and  
189 Wolfe 2006). The other four RP families, including RPP1, RPP2, RPL9, and RPS22, have  
190 duplicates in most budding yeasts, including these non-WGD species, suggesting that they  
191 have been duplicated before the divergence of all budding yeasts. Therefore, most post-WGD  
192 budding yeasts have a significant increase in RP gene number. 135-137 RP genes are present  
193 in the four species in the *Saccharomyces sensu stricto* group, *S. cerevisiae*, *S. mikatae*, *S.*  
194 *uvarum*, and *S. eubayanus*. The two *Naumovozyima* species have 134 and 137 RP genes,

195 respectively. The numbers are relatively smaller (106 and 104) in the other two early-diverging  
196 post-WGD species, *Tetrapisispora phaffii* and *Vanderwaltozyma polyspora*. In contrast, the  
197 human opportunistic pathogen *Candida glabrata* (*Nakaseomyces glabrata*) and its closely  
198 related species, *Nakaseomyces bacillisporus*, have only 85 and 97 RP genes respectively,  
199 suggesting most RP duplicate genes have been lost in these species.

200 Because the timings of these RP duplications in budding yeast have already been  
201 determined, it is possible to infer which RP paralogs have experienced gene conversion by  
202 comparing their gene tree with their true duplication history. We can also use the tree topology  
203 to infer when concerted evolution had terminated, which is the time when the paralogous genes  
204 started to accumulate mutations independently in each paralogous gene. To simplify this  
205 process, we constructed phylogenetic trees for each duplicate RP family using five  
206 representative WGD species with different divergence times, including *S. cerevisiae*, *S.*  
207 *mikatae*, *S. eubayanus*, *N. castellii* and *T. phaffii* (fig. 3 and Supplementary File 2). We found  
208 that at least 52 RP duplicate pairs in *S. cerevisiae* have experienced gene conversion, including  
209 50 pairs generated by WGD and two pairs (RPL9 and RPS22) generated by the ancient  
210 duplication events (fig. 3). Therefore, 88% (52 out of 59) of RP paralogous genes in *S.*  
211 *cerevisiae* have experienced gene conversion, which is more than that of previously identified  
212 (16 and 29) (Evangelisti and Conant 2010; Casola, et al. 2012), suggesting that concerted  
213 evolution of RP genes in the budding yeasts is more prevalent than previously recognized.

214 Based on gene tree topologies, we inferred when concerted evolution of RP genes had  
215 terminated during the evolution of budding yeasts. In 21 RP families, two copies of each RP  
216 family gene in *S. cerevisiae* form a species-specific clade in gene tree (fig. 3A and  
217 Supplementary File 2), suggesting that the concerted evolution is still ongoing in *S. cerevisiae* or  
218 has recently terminated after its divergence from *S. mikatae*. In seven RP families, termination  
219 of concerted evolution occurred before the split between *S. cerevisiae* and *S. mikatae* (fig. 3B).  
220 24 RP families have ended their concerted evolution before the divergence of the  
221 *Saccharomyces sensu stricto* group, which including *S. cerevisiae*, *S. mikatae*, *S. eubayanus*  
222 (fig. 3C). Only seven RP gene pairs do not show strong evidence of gene conversion (fig. 3 D).  
223 A summary of the termination time of concerted evolution in 59 RP pairs in *S. cerevisiae* was  
224 provided in fig. 3E.

## 225 **Duplication and concerted evolution of RP genes in the fission yeasts**



226 We identified all RP genes for five species in the subphylum of Taphrinomycotina, including  
227 the four fission yeasts and *Pneumocystis murina*. *P. murina* belongs to the class of  
228 Pneumocystidomycetes, which is probably the most closely related lineage to the fission yeasts,  
229 and it was used as an outgroup to infer the evolutionary history of RP genes. 142 to 145 RPs  
230 are present in the four fission yeast species. The number of RP families with duplicate copies  
231 range from 58 to 59 in the four species (fig. 1 and Supplementary table 2). Most of them have  
232 two gene copies, but three copies of RP genes are present in 6 RP families (fig. 1). Only 78 RP  
233 genes were identified in *P. murina*. Thus, it is reasonable to assume that the massive expansion  
234 of RPs genes in the fission yeasts occurred after their divergence with *P. murina*.

235 Similar to the budding yeasts, most paralogous RP genes in each fission yeast are more  
236 similar to each other than to their orthologous genes (fig. 2 and Supplementary File 3). The tree  
237 topologies indicate that these RP genes were duplicated independently in each fission yeast  
238 after their divergence. However, we should consider the possibility of gene duplication which  
239 resulted in underestimation the ages of duplicate genes. To infer when gene duplication  
240 occurred, we conducted gene collinearity (microsynteny) analysis for all duplicate RP genes in  
241 the four fission yeasts (see Methods and Materials). If an RP gene was duplicated  
242 independently in each species after their divergence, the daughter genes are expected to be  
243 found in different genomic regions among these species. Under this scenario, only the parental  
244 copy of RP genes share microsynteny by them, and it is extremely unlikely that they also share  
245 conserved regions of microsynteny around the daughter genes. On the other hand, if these  
246 fission yeasts share microsynteny in both copies of RP genes, the two copies should be created  
247 by a single gene duplication event in their common ancestor.

248 We first identified all orthologous groups in the four fission yeasts (Supplementary table 4).  
249 Based on gene order and ortholog group information, we analyzed microsynteny for each pair of  
250 RP genes. Herein, we defined a conserved region of microsynteny as a block containing three  
251 or more conserved homologs within five genes downstream and upstream of an RP gene (fig.  
252 4A). In *Sch. pombe*, 58 RP families have at least two gene copies. In each of the RP families,  
253 the duplicate genes share microsynteny in *Sch. pombe*, *Sch. cryophilus*, and *Sch. octosporus*  
254 (Supplementary table 5). This result suggests that duplicate pairs in the 58 RP families were  
255 generated at least before the divergence of the three fission yeasts, which have occurred ~119  
256 million years ago (mya) (Rhind, et al. 2011). We then inferred how many of gene duplication  
257 events occurred even before the split of *Sch. japonicas*, approximately 220 mya (Rhind, et al.  
258 2011). Thanks to the highly conserved gene order in fission yeasts (Rajeh, et al. 2018), we were

259 able to detect the presence of microsynteny in both RP duplicates in 49 families in *Sch.*  
260 *japonicus*, suggesting that gene duplication of these RP families have occurred before the  
261 divergence of the four fission yeasts (Supplementary table 5). For example, two copies of  
262 RPL11 genes are found in each *Schizosaccharomyces* species. Highly conserved regions of  
263 microsynteny surrounding RPL11A genes were found in all four fission yeasts, and so were the  
264 RPL11B genes (fig. 4A), supporting that RPL11 was duplicated in their common ancestor and  
265 both copies have been maintained in each fission yeast after their divergence.

266 For the rest 9 RP families, we did not obtain conclusive evidence to determine whether they  
267 were duplicated before the split of *Sch. japonicus*. Four of them (RPL10, RPL30, RPS12, and  
268 RPS25) has only a single RP copy present in *Sch. japonicus*. These genes could be duplicated  
269 in the common ancestor of fission yeasts, and a duplicate copy has subsequently lost in *Sch.*  
270 *japonicus*. Alternatively, the duplication events have occurred after the split of *Sch. japonicus*  
271 from the other species. In the other five RP families (RPL3, RPL17, RPL18, RPL21, and  
272 RPS19), only one RP copy in *Sch. japonicus* share microsynteny with the other three species.  
273 Similarly, the duplication events of these RP families could be predated to the divergence of  
274 fission yeasts, following by genome rearrangements in *Sch. japonicus* that resulted in the loss of  
275 its gene collinearity. However, we cannot exclude the possibility that they were generated by  
276 independent duplication events in *Sch. japonicus*.

277 To determine the number of RP families has an incompatibility between gene phylogenetic  
278 tree and duplication history, we constructed a phylogenetic tree for each RP family with  
279 duplicates in the fission yeasts. In the case of RPL11, contradict to the gene true duplication  
280 history as inferred by microsynteny analysis (fig. 4A), the phylogenetic tree shows that RPL11  
281 paralogs from species-specific clades in each fission yeast (Fig. 4B). Such incompatibility  
282 suggests that gene conversion has occurred between RPL11 paralogous genes in each fission  
283 yeast after their divergence. A total number of 45 RP families (77.6%) in fission yeasts have a  
284 similar tree topology to RPL11 (Supplementary File 3). In other families, such as RPS17, the  
285 two copies of RP genes from *Sch. pombe*, *Sch. octosporus* and *Sch. cryophilus* form two clades  
286 and each clade have one gene copy from the three species. We observed nine RP families  
287 similar to RPS17, suggesting that concerted evolution of these RP genes might have been  
288 terminated before their divergence (fig. 4C). However, we did not find evidence of gene  
289 conversion in four RP families, including RPL30, RPS5, RPS12 and RPS28 (fig. 4D and E).

290 **Retroposition as a major mechanism for massive duplication of RP genes in the**  
291 **ancestral fission yeast**

292 Because no WGD was detected during the evolution of *Sch. pombe* (Rhind, et al. 2011), we  
293 then inferred other mechanisms that resulted in massive duplication of RP genes in the fission  
294 yeasts, such as unequal crossing-over and retroposition. Unequal crossing-over typically  
295 generates segmental or tandem gene duplicates. If a pair of genes was generated by segmental  
296 duplication, we expect to observe microsynteny between regions of paralogous RP genes within  
297 a species. However, we did not find any case in these RP families (Supplementary table 5).  
298 Furthermore, we did not detect tandemly arranged RP paralogous genes, suggesting that  
299 unequal crossing-over is not a main contributor for RP duplications in the fission yeasts either.

300 Retroposition generates retroduplicates through random insertion of a retrotranscribed  
301 cDNA from parental source genes, resulting in intron-less retroduplicate genes (Kaessmann, et  
302 al. 2009). We examined the exon-intron structure for all RP paralogous genes in *Sch. pombe*.  
303 Among the 21 singleton RP families in *Sch. pombe*, only 7 of them (33.3%) are intron-less  
304 (Supplementary table 6). In contrast, 33 of 58 duplicate RP families (56.9%) have at least one  
305 copy of intron-less gene, which is significantly higher than the group of singleton RPs ( $p =$   
306  $0.006$ , Fisher exact test). This ratio is also significantly higher than 27.3% of RP duplicates  
307 generated by WGD in *S. cerevisiae*. Thus, the enrichment of intron-less RP genes in the  
308 duplicate RP families in fission yeast suggests that they were likely generated by retroposition.  
309 For those RP duplicates with intron in both copies, the possibility that they may be created by  
310 retroposition following by insertion of intron cannot be excluded, because the locations and  
311 phases of introns between these paralogous RP genes in *Sch. pombe* are usually different.

312 **Duplication and concerted evolution of RP genes in the Mucoromycota species**

313 Four Mucoromycota species examined demonstrate massive duplication of RP genes.  
314 Three of them belong to the order of Mucorales (pin molds) in subphylum of Mucoromycotina  
315 (311 RP genes in *R. delemar*, 182 in *R. microspores*, and 217 in *P. blakesleeanus*). In their  
316 distantly related species in the same subphylum, *Bifiguratus adelaidae*, only 89 RP genes were  
317 found. Massive duplication of RP genes (137 RP genes) was also observed in *Lobosporangium*  
318 *transversale*, which is a distantly related species belonging to another subphylum  
319 Mortierellomycotina. The earliest diverging species among all Mucoromycota species examined  
320 is *Rhizophagus irregularis*, which has only 78 RPs genes (fig. 1).

321 Based on RP gene copy numbers and the evolutionary relationships of these Mucoromycota  
322 species, it is most parsimonious to conclude that massive expansion of RP genes in the three  
323 pin mold species and *L. transversale* occurred independently. *L. transversale* is a rare species  
324 that having only been reported by a few isolations in North American (Benny and Blackwell  
325 2004). The genomic studies and physiological characterizations *L. transversale* are scarce. Due  
326 to lack of genomic data from closely related species, we cannot provide a systematic inference  
327 of the timing and nature of massive RP duplication in *L. transversale*. Thus, our subsequent  
328 analysis only focused on the origin and evolution of RP duplicate genes in pin molds.

329 A WGD event has been proposed in ancestral *R. delemar* (Ma, et al. 2009). Another WGD  
330 was speculated to have occurred in *P. blakesleeanus* prior to its divergence from *R.*  
331 *microspores* and *R. delemar* (Corrochano, et al. 2016). Therefore, *R. delemar* might have  
332 experienced two rounds of WGDs, which correlates with the largest RP repertoire (311)  
333 identified in *R. delemar*, while *P. blakesleeanus* and *R. microspores* have 217 and 182 RP  
334 genes respectively. Based on RP gene numbers, it is reasonable to conclude that the second  
335 WGD occurred after the divergence of *R. delemar* from *R. microspores*.

336 We conducted microsynteny analysis to infer which RP gene pairs were generated by the  
337 WGDs in the pin molds. The estimated divergence time between *Phycomyces* and *Rhizopus* is  
338 over 750 mya (Mendoza, et al. 2014). Most, if not all, microsynteny blocks generated by the first  
339 WGD might have lost during the evolution of these pin molds. Even though we have used a less  
340 strict definition of microsynteny (a minimum of 3 shared homologs in a block of  $\pm 10$  neighboring  
341 genes surrounding RP), we only identified 3 and 10 pairs of microsynteny blocks between  
342 paralogous RP genes in *R. microspores* and *P. blakesleeanus* respectively. In contrast, in *R.*  
343 *delemar*, which has experienced a second round of WGD after its divergence from *R.*  
344 *microspores*, we detected microsynteny for 63 pairs of RP paralogous genes (Supplementary  
345 table 7), supporting the recent WGD as a major contributor to the expansion of RP genes in *R.*  
346 *delemar*.

347 We attempted to identify microsynteny for orthologous RP genes to infer the evolutionary  
348 history of each RP family in pin molds (Supplementary table 8). Due to the large divergence  
349 times between these species, most RP orthologous genes lack well-supported microsynteny  
350 (Supplementary table 7). The most well-supported example is probably the RPL3 family (Fig.  
351 5A). Based on the shared gene orders between paralogous and orthologous RPL3 genes, it is  
352 reasonable to infer that RPL3 was duplicated before the divergence of the three pin mold

353 species, probably due to the first WGD. In *R. delemar*, the two RPL3 genes have been further  
354 duplicated by the recent WGD, generating four copies. However, their gene tree (fig. 5B)  
355 demonstrates that the RPL3 paralogous genes in each species form a species-specific clade,  
356 suggesting the occurrence of gene conversion between paralogous RPL3 genes in each  
357 species. A total number of 57 RP families have a similar tree topology (Supplementary File 4).  
358 Although there is no conclusive microsynteny evidence to support that these RP families have  
359 the same evolutionary history as RPL3, we believed that it would be the most likely scenario. In  
360 some RP families, such as RPL38 (fig. 5C), the genes from *R. delemar* and *R. microspores*  
361 form two clades, and each clade has members from both species. There are 17 RP families  
362 have a similar tree topology to RPL38. If these RP genes were the product of the ancient WGD,  
363 their concerted evolution had terminated prior to the divergence of the two *Rhizopus* species.  
364 The last type of tree topology, such as RPS20 (fig. 5D), whose members form two clades, and  
365 each clade include genes from all the three pin mold species. Such tree topology does not  
366 support the occurrence of gene conversion. We observed two RP families belonging to this  
367 type. In summary, our results implied that most RP paralogous genes in pin molds might have  
368 also experienced gene conversion, similar to what happened in budding yeasts and fission  
369 yeasts.

### 370 **cDNA as the probable donor for gene conversion between RP paralogous genes**

371 During gene conversion, the genomic sequence of the 'acceptor' locus is replaced by a  
372 'donor' sequence through recombination (Chen, et al. 2007). The donor can be genomic DNA or  
373 cDNA derived from an mRNA intermediate (Derr and Strathern 1993; Storici, et al. 2007). If  
374 genomic DNA is the donor, the sequences of both intron and exon can be homogenized. In  
375 contrast, if cDNA is the donor, only the exon sequences of the acceptor are replaced.  
376 Considering that synonymous mutations are largely free from natural selection, it is possible to  
377 determine the donor of gene conversion by comparing the substitution rates between intron and  
378 synonymous sites of exons. If the synonymous substitution rates ( $d_S$ ) are significantly lower than  
379 intron mutation rates ( $\mu_{intron}$ ), supporting cDNA as a donor. We calculated  $d_S$  and  $\mu_{intron}$  for all RP  
380 duplicate genes for presentative species from each fungal lineage: *S. cerevisiae*, *Sch. pombe*  
381 and *R. microspores* (Supplemental table 9). Overall, the  $d_S$  values of all paralogous RP genes  
382 are significantly lower than  $\mu_{intron}$  in each species examined (fig. 6A-C, Student's t-test,  $p < 0.01$ ).  
383 Considering that different genomic regions might have different mutation rates, we then  
384 compared the  $d_S$  and  $\mu_{intron}$  between each pair of RP duplicate genes (fig. 6D-E). Consistently,  
385 most of RP duplicate gene pairs have lower  $d_S$  values than  $\mu_{intron}$ . In a small number of cases,

386 high  $d_S$  are observed, probably because the concerted evolution between a pair of orthologous  
387 genes have terminated long time ago, resulting accumulation of many synonymous mutations.  
388 These results suggest that, in most cases, only the coding sequences have been homogenized  
389 by gene conversion, supporting cDNA as the probable gene conversion donor.

### 390 **The retention of RP gene duplicates was associated with the evolution to fermentative** 391 **ability in fungi**

392 Most eukaryotic species fully oxidize glucose, their primary carbon and energy source,  
393 through mitochondrial oxidative phosphorylation in the presence of oxygen for maximum energy  
394 production. In contrast, post-WGD budding yeasts and fission yeasts predominantly ferment  
395 sugar to ethanol in the presence of excess sugars, even under aerobic conditions, which was  
396 called aerobic fermentation (Alexander and Jeffries 1990; Lin and Li 2011a). Aerobic  
397 fermentation has independently evolved in the budding yeasts and fission yeasts (de Jong-  
398 Gubbels, et al. 1996). In addition, the domesticated form of *R. microspores* has been a widely  
399 used starter culture for the production of tempeh from fermented soybean (Hachmeister and  
400 Fung 1993). Its close relative, *R. delemar*, was also well known as efficient ethanol and fumaric  
401 acid producer by fermentation (Kito, et al. 2009; Straathof and van Gulik 2012). *P.*  
402 *blakesleeana* was known for capable of fermenting sugar into  $\beta$ -carotene at an industrial  
403 scale, which is derived from the end product of glycolysis (Kaessmann, et al. 2009).

404 We speculated that the massive duplication and retention of RP genes have contributed to  
405 the evolution of fermentative ability in these species. Increased gene dosage could lead to a  
406 quantitative increase in gene expression and production of protein. To determine the impact of  
407 gene duplication on the production of RP transcripts, we calculated the total transcription  
408 abundance of all RP genes using our transcriptomic data generated by Cap Analysis of Gene  
409 Expression (CAGE) (McMillan, et al. 2019). The CAGE technique captures and sequences the  
410 first 75 bp of transcripts, which quantifies the transcription abundance based on numbers of  
411 mapped reads (Murata, et al. 2014). Among the 34 species, 11 of them have available CAGE  
412 data, including nine budding yeasts and two fission yeasts (Supplementary table 10). As shown  
413 in fig. 7A, the RP copy numbers are positively correlated with total transcription abundance value  
414 of all RP genes (Supplemental table 10, Pearson correlation  $r = 0.72$ ), supporting that the  
415 increased RP gene dosage might have increased ribosome biogenesis by generating more RP  
416 transcripts.

417 We then infer whether increased RP gene dosage is associated with better fermentative  
418 ability. A previous study has measured various physiological characteristics for over 40 yeast  
419 species (Hagman, et al. 2013), including 19 species examined in this study. We observed a  
420 positive correlation between RP gene number and ethanol production efficiency ( $r = 0.80$ ), and  
421 glucose consumption rate ( $r = 0.76$ ) (fig. 7B and C). We also observed a significant positive  
422 correlation between total RP expression and both ethanol production efficiency ( $r = 0.87$ ) and  
423 glucose consumption rate ( $r = 0.88$ ) (Supplementary fig. 2). These results suggest that the  
424 increased RP expression by gene duplication might have enhanced these organisms' ability to  
425 rapidly consuming glucose through the fermentation pathway.

## 426 Discussion

### 427 The preferential retention of RP duplicate genes was selection-driven

428 Our survey of 295 fungal genomes revealed that massive duplications of RP genes are not  
429 prevalent. However, a significant increase in RP gene copy numbers had independently  
430 occurred a small number of species in three distantly related lineages in fungi. WGD events  
431 have played an important role in the expansion RP repertoire in the budding yeasts and pin  
432 molds. In the budding yeasts, only ~10% of WGD ohnologs have survived, while 70.5% of RP  
433 duplicates generated by WGD have been maintained in *S. cerevisiae*. As indicated by previous  
434 studies, the survival rate of RP ohnologs is significantly higher than the other WGD ohnologs  
435 (Papp, et al. 2003).

436 Our results suggested that RP genes in the fission yeasts were likely individually duplicated  
437 by small-scale duplication events (SSD), such as retroposition. In general, the gene retention  
438 rate of SSDs is much lower than ohnologs (half-life of 4 million years vs 33 million years)  
439 (Hakes, et al. 2007), it is even lower in genes encoding macromolecular complexes due to  
440 evolutionary constraints imposed by gene dosage balance (Li, et al. 1996; Conant and Wolfe  
441 2008). Similar to the fission yeasts, 99.8% of RP duplicates in mammals were found to be  
442 generated by retroposition (Dharia, et al. 2014). However, almost all RP retroduplicates in  
443 mammals become pseudogenes (Dharia, et al. 2014). Therefore, the high retention rates of  
444 functional RP duplicates generated by SSDs in each fission yeasts are indeed unexpected. A  
445 reasonable explanation is that the increased RP gene dosage have provided selective  
446 advantages to these species, natural selection favored the retention of RP duplicate genes.

447 There is another line of evidence supporting that the retention of RP duplicate genes in  
448 fission yeasts was selection-driven. The fission yeasts have been known to maintain a single  
449 copy of genes in most gene families (Rhind, et al. 2011; Rajeh, et al. 2018). Based on our  
450 orthologous group data (Supplementary table 4), in 86% (4069/4734) of fission yeast ortholog  
451 groups, only a single copy gene is present in each of the four species (or 1:1:1:1 ortholog). Of  
452 the gene families with gene duplication or loss in at least one fission yeast species, ribosomal  
453 proteins account for 9.3% (62/665) of them, which is significantly overrepresented in this group  
454 ( $p < 10^{-5}$ , Fisher exact test).

#### 455 **How duplication and retention of RP genes contributed to the evolution of fermentative** 456 **ability in fungi**

457 Our data suggested that the retention of RP duplication genes might have been driven by  
458 their contributions to the evolution of strong fermentative ability in these organisms. The  
459 fermentative yeasts were believed to have gained a growth advantage through rapid glucose  
460 fermentation in the presence of excess sugars (Piskur, et al. 2006). It was found that *S.*  
461 *cerevisiae* often outgrew its non-fermentative competitors in co-culture experiments (Pérez-  
462 Nevado, et al. 2006; Williams, et al. 2015). Fermentation is a much less efficient way to  
463 generate energy. Through fermentation, each glucose molecule only yields 2 ATP from  
464 glycolysis, compared to 32 ATP through mitochondrial oxidative phosphorylation pathway. In  
465 sugar rich environments, fermentative organisms are able to produce more ATP per unit time by  
466 rapidly consuming sugars through fermentation, providing selective advantages (Pfeiffer, et al.  
467 2001; Pfeiffer and Morley 2014). The rapid glucose consumption was facilitated by the  
468 increased glycolysis flux and more efficiently transporting glucose across cellular membranes.  
469 The enhanced glycolytic activity is also present in many tumor cells, known as the “Warburg  
470 effect” (Vander Heiden, et al. 2009; Diaz-Ruiz, et al. 2011). It has been shown that increased  
471 copy number of genes related to glycolysis (Conant and Wolfe 2007) and glucose transporters  
472 (Lin and Li 2011b) have played an important role in the switch of glucose metabolism. Similarly,  
473 it is reasonable to propose that the increased RP gene dosage increased their transcript  
474 abundance and ribosome biogenesis, resulting in increased biogenesis of glycolysis enzymes,  
475 glucose transporters, and other building blocks for cell growth and proliferation.

476 Ribosome biosynthesis, however, comes with the opportunity cost of higher expression of  
477 other cellular processes needed for cell viability and function. Maintaining one RP gene per  
478 family may be advantageous for most other species to allow for greater Pol II transcription



479 potential for other genes. However, massive duplication of RP genes made it possible to rapidly  
480 consume glucose through the low-efficient fermentative pathway, and at the same time maintain  
481 a high growth rate. Such physiological characteristics provided selective advantages to the  
482 organisms in sugar rich environments, which well explained the high retention rate of RP  
483 duplicates in fungal species.

#### 484 **Gene duplication allows further increase of transcription abundance from highly** 485 **expressed RP genes**

486 One may argue that increased of ribosome biosynthesis can also be achieved by elevated  
487 transcription activities of RP genes. It is probably true because we also observed elevated  
488 expression level of RP genes in the two non-WGD yeasts with an intermediate level of ethanol  
489 fermentation ability: *Lachancea thermotolerans* and *Lachancea waltii* (Hagman, et al. 2013).  
490 Across all eukaryotic species, RP genes are the group of most abundantly transcribed genes in  
491 eukaryotic cells, accounting for 50% of RNA polymerase II (Pol II) transcription (Warner 1999).  
492 RP genes have the highest density of bound Pol II. 100 RP genes have on average >60% of the  
493 maximum Pol II occupancy, while a majority of the genome only has <5% of the maximum Pol II  
494 density (Venters and Pugh 2009). Therefore, there is limited room for further increase the  
495 transcription abundance of RP genes. However, duplication of RP genes provides an additional  
496 substrate on which Pol II can transcribe into RP mRNAs, reducing transcription as a rate-limiting  
497 step in the process of ribosome biogenesis.

#### 498 **Gene conversion facilitated retentions of RP duplicate genes**

499 The sequences of all RP families are highly conserved during the evolution of eukaryotes  
500 due to their vital roles in many cellular functions (Korobeinikova, et al. 2012). Because  
501 misfolding and misinteractions of highly abundant proteins can be more costly, proteins likely  
502 RPs should have been under more functional constraints and evolved even slower than other  
503 important proteins (Zhang and Yang 2015). It has shown that there is a strong evolutionary  
504 constraint posed on the duplicability of genes encoding core components of protein complexes  
505 (Li, et al. 2006). Accumulation of new mutations in duplicate genes could impact the stability of  
506 protein complexes, posing selective disadvantages. The other structure component of  
507 ribosomes, rRNA, is one of the best-known examples of concerted evolution (Liao 1999; Nei  
508 and Rooney 2005).

509 Our study confirms that gene conversion following the duplication of RP genes appears to  
510 be a universal path in fungal species. Through gene conversion, the sequences of paralogous  
511 genes are homogenized, easing the new mutations accumulated in one of the paralogous  
512 genes. It has been shown that highly-expressed genes are more likely to experience mRNA-  
513 mediated gene conversion (Weng, et al. 2000; Schildkraut, et al. 2006). Thus, as a group of  
514 most actively transcribed genes (Warner 1999), the repeated occurrence of gene conversion on  
515 RP genes might be due to the highly expressed nature of RP genes. It was also found that the  
516 promoter or flanking genomic sequences are much more divergence than coding sequences  
517 between paralogous RP genes (Evangelisti and Conant 2010), further supporting gene  
518 conversion in RPs was mediated by cDNA. Gene conversion could provide an additional layer  
519 of protection on top of purifying selection to remove newly accumulated mutations (Evangelisti  
520 and Conant 2010; Scienski, et al. 2015). Increased RP genes copies could be advantageous to  
521 fungal species in sugar-rich environments through fermentative growth. Therefore, the repeated  
522 occurrence of gene conversions between RP paralogous genes have contributed to the  
523 maintenance of functional RP duplicates in these organisms by removing newly accumulated  
524 mutations.

## 525 **Materials and Methods**

### 526 **Data sources, identification and manual curation of RP repertoire**

527 We obtained a list of RP genes from *S. cerevisiae* and *Sch. pombe* from the Ribosomal  
528 Protein Gene Database (RPG)(Nakao, et al. 2004). We downloaded RefSeq protein sequence  
529 data of 285 fungal genomes from NCBI (Table S1). In the first round of homologous sequences,  
530 we used RP sequences from *S. cerevisiae* and *Sch. pombe* as queries to run BLASTP search  
531 against the 285 proteomic data (Camacho, et al. 2009). For BLASTP search, we used e-value  
532 cutoff of 1e-10, and only hits with a minimum alignment length of 50% of query sequences were  
533 considered as homologous RP genes.

534 In the second round of homologous searches, we obtained the protein and genome  
535 sequences of 34 fungal species from NCBI WGS, JGI and Yeast Gene Order Browser (YGOB)  
536 (Byrne and Wolfe 2005; Maguire, et al. 2013) (Supplementary table 2). We first used 79 RP  
537 protein sequences from *S. cerevisiae* and *Sch. pombe* as queries to search for homologous  
538 sequences from the ten newly added fungal species using BLASTP. To identify RP sequences  
539 not predicted by existing genome annotations, we conducted TBLASTN searches against all 34

540 genomic sequences. Manual inspections were performed to compare the BLASTP and  
541 TBLASTN results to identify discrepant hits. For hits obtained by TBLASTN by not BLASTP, we  
542 predicted the coding sequences (CDS) based on six frame translations of genomic sequences.  
543 The exon-intron boundaries were determined based on the TBLASTN alignments and the  
544 presence of GT/AG splice sites in flanking intron sequences. We also revised the predicted  
545 protein sequences if there is a discrepancy in aligned regions between BLASTP and TBLASTN  
546 results. The same gene prediction method was used to revise misannotated ORF.

#### 547 **Construction of phylogenetic tree for RP genes**

548 We inferred the phylogeny for each of the 79 RP families using the RP protein sequences  
549 collected from the 34 fungal species. Sequences were aligned through MUSCLE (Edgar 2004).  
550 The molecular phylogenetic tree was inferred by the Maximum likelihood method using RAxML  
551 with 100 bootstrap pseudo-replicates (Stamatakis 2006). The best-fit substitution model was  
552 inferred by using ProtTest (Abascal, et al. 2005). As the best substitution models are the LG  
553 model were identified for the majority of RP families, it was used in our phylogenetic  
554 reconstruction. A discrete Gamma distribution [+G] and invariable sites [+I] was used to model  
555 evolutionary rate differences among sites. We also constructed lineage-specific phylogenetic  
556 trees for duplicate RP families using representative species from each of the three fungal  
557 lineages using Neighbor-Joining method using MEGA 7 (Kumar, et al. 2016). For those RP  
558 families with almost identical amino acid sequences, we used their CDS for construction of gene  
559 trees to obtain better resolved phylogenetic trees (Supplementary Files 2-4).

#### 560 **Homology microsynteny analysis**

561 We conducted microsynteny analysis for each RP gene family in the four  
562 Schizosaccharomyces species and four Mucoromycotina species, including *R. delemar*, *R.*  
563 *microspores*, *P. blakesleeanus* and *B. adelaidae*. Gene order information was retrieved from  
564 genome annotations of each species obtained from NCBI. The orthologous gene groups in the  
565 four fission yeast species and four Mucoromycotina species were respectively identified using  
566 the OrthoDB (Kriventseva, et al. 2014). For fission yeasts, we obtained a list of ten genes  
567 surrounding each RP gene (five upstream and five downstream of RP gene). For the Mucorales  
568 species, we extended our microsynteny analysis to a block of ten genes upstream and ten  
569 downstream of RP gene due to their divergent genome structures.

## 570 **Estimation of substitution rates in intron and synonymous sites**

571 We calculated the substitution rates for every pair of duplicate RP genes for three species  
572 representing the three fungal lineages with massive RP duplications, including *S. cerevisiae*,  
573 *Sch. pombe*, *R. microspores*. The CDS and intron sequences were retrieved from NCBI, and  
574 were aligned using MUSCLE. Synonymous substitution rate was calculated using Li-Wu-Luo  
575 method with Kimura 2-parameter model (Li, et al. 1985) in MEGA 7 (Kumar, et al. 2016).  
576 Nucleotide substitution rates in intron sequences were calculated using the Kimura 2-parameter  
577 model in MEGA 7.

## 578 **Analysis of RP gene transcriptomic and physiological data**

579 The transcriptomic data of nine budding yeasts and two fission yeasts examined were  
580 obtained from (McMillan, et al. 2019) based on CAGE. The expression abundance of an RP  
581 gene was defined as the sum of transcripts initiated from all core promoters within 500 base  
582 pairs upstream of its annotated start codon, which were normalized as TPM (tags per million  
583 mapped reads, and each tag represent one sequenced transcript). The total transcription  
584 abundance of RP genes in a species was calculated as the sum of TPM of all RP genes  
585 identified in this species. For newly predicted RP genes that were not annotated in CAGE  
586 datasets, we performed TBLASTN searches to determine their genomic locations of CDS and  
587 obtain the expression abundance data using the same criteria. The ethanol production efficiency  
588 and glucose consumption rate of 19 budding and fission yeast species were obtained from  
589 (Hagman, et al. 2013). The ethanol production efficiency was measured as grams of ethanol  
590 produced per gram of biomass per gram of glucose consumed. The glucose consumption rate  
591 was measured as grams of glucose consumed per gram of biomass per hour. If multiple  
592 biological replicates were measured for a single species, their average values were used for our  
593 analysis.

## 594 **Acknowledgements**

595 This study was supported by the start-up fund and President's Research Fund from Saint  
596 Louis University to ZL. We would like to thank Dr. Zhenglong Gu and Dr. Dapeng Zhang for  
597 valuable discussions and suggestions to this work.

598

## 599 References

600

601 Abascal F, Zardoya R, Posada D. 2005. ProtTest: selection of best-fit models of protein  
602 evolution. *Bioinformatics* 21:2104-2105.

603 Alexander MA, Jeffries TW. 1990. Respiratory efficiency and metabolite partitioning as  
604 regulatory phenomena in yeasts. *Enzyme Microb Technol* 12:2-19.

605 Arnheim N, Krystal M, Schmickel R, Wilson G, Ryder O, Zimmer E. 1980. Molecular evidence  
606 for genetic exchanges among ribosomal genes on nonhomologous chromosomes in man and  
607 apes. *Proc Natl Acad Sci U S A* 77:7323-7327.

608 Barakat A, Szick-Miranda K, Chang F, Guyot R, Blanc G, Cooke R, Delseny M, Bailey-Serres J.  
609 2001. The organization of cytoplasmic ribosomal protein genes in the Arabidopsis genome.  
610 *Plant Physiol* 127:398-415.

611 Benny GL, Blackwell M. 2004. Lobosporangium, a new name for Echinosporangium Malloch,  
612 and Gamsiella, a new genus for Mortierella multidivariata. *Mycologia* 96:143-149.

613 Birchler JA, Veitia RA. 2012. Gene balance hypothesis: Connecting issues of dosage sensitivity  
614 across biological disciplines. *Proceedings of the National Academy of Sciences* 109:14746-  
615 14753.

616 Blattner FR, Plunkett G, 3rd, Bloch CA, Perna NT, Burland V, Riley M, Collado-Vides J, Glasner  
617 JD, Rode CK, Mayhew GF, et al. 1997. The complete genome sequence of Escherichia coli K-  
618 12. *Science* 277:1453-1462.

619 Brauer MJ, Huttenhower C, Airoidi EM, Rosenstein R, Matese JC, Gresham D, Boer VM,  
620 Troyanskaya OG, Botstein D. 2008. Coordination of growth rate, cell cycle, stress response,  
621 and metabolic activity in yeast. *Mol Biol Cell* 19:352-367.

622 Brown DD, Wensink PC, Jordan E. 1972. A comparison of the ribosomal DNA's of *Xenopus*  
623 *laevis* and *Xenopus mulleri*: the evolution of tandem genes. *J Mol Biol* 63:57-73.

624 Byrne KP, Wolfe KH. 2005. The Yeast Gene Order Browser: combining curated homology and  
625 syntenic context reveals gene fate in polyploid species. *Genome research* 15:1456-1461.

626 Camacho C, Coulouris G, Avagyan V, Ma N, Papadopoulos J, Bealer K, Madden TL. 2009.  
627 BLAST+: architecture and applications. *BMC Bioinformatics* 10:421.

628 Casola C, Conant GC, Hahn MW. 2012. Very low rate of gene conversion in the yeast genome.  
629 *Mol Biol Evol* 29:3817-3826.

630 Chen JM, Cooper DN, Chuzhanova N, Ferec C, Patrinos GP. 2007. Gene conversion:  
631 mechanisms, evolution and human disease. *Nat Rev Genet* 8:762-775.

632 Conant GC, Wolfe KH. 2006. Functional partitioning of yeast co-expression networks after  
633 genome duplication. *PLoS Biol* 4:e109.

634 Conant GC, Wolfe KH. 2007. Increased glycolytic flux as an outcome of whole-genome  
635 duplication in yeast. *Mol Syst Biol* 3:129.

- 636 Conant GC, Wolfe KH. 2008. Turning a hobby into a job: how duplicated genes find new  
637 functions. *Nat Rev Genet* 9:938-950.
- 638 Corrochano LM, Kuo A, Marcet-Houben M, Polaino S, Salamov A, Villalobos-Escobedo JM,  
639 Grimwood J, Alvarez MI, Avalos J, Bauer D, et al. 2016. Expansion of Signal Transduction  
640 Pathways in Fungi by Extensive Genome Duplication. *Curr Biol* 26:1577-1584.
- 641 de Jong-Gubbels P, van Dijken JP, Pronk JT. 1996. Metabolic fluxes in chemostat cultures of  
642 *Schizosaccharomyces pombe* grown on mixtures of glucose and ethanol. *Microbiology*  
643 142:1399-1407.
- 644 Derr LK, Strathern JN. 1993. A role for reverse transcripts in gene conversion. *Nature* 361:170.
- 645 Dharia AP, Obla A, Gajdosik MD, Simon A, Nelson CE. 2014. Tempo and mode of gene  
646 duplication in mammalian ribosomal protein evolution. *PLoS ONE* 9:e111721.
- 647 Diaz-Ruiz R, Rigoulet M, Devin A. 2011. The Warburg and Crabtree effects: On the origin of  
648 cancer cell energy metabolism and of yeast glucose repression. *Biochim Biophys Acta*  
649 1807:568-576.
- 650 Dudov KP, Perry RP. 1984. The gene family encoding the mouse ribosomal protein L32  
651 contains a uniquely expressed intron-containing gene and an unmutated processed gene. *Cell*  
652 37:457-468.
- 653 Edgar RC. 2004. MUSCLE: multiple sequence alignment with high accuracy and high  
654 throughput. *Nucleic Acids Res* 32:1792-1797.
- 655 Evangelisti AM, Conant GC. 2010. Nonrandom survival of gene conversions among yeast  
656 ribosomal proteins duplicated through genome doubling. *Genome Biol Evol* 2:826-834.
- 657 Hachmeister KA, Fung DY. 1993. Tempeh: a mold-modified indigenous fermented food made  
658 from soybeans and/or cereal grains. *Crit Rev Microbiol* 19:137-188.
- 659 Hagman A, Sall T, Compagno C, Piskur J. 2013. Yeast "make-accumulate-consume" life  
660 strategy evolved as a multi-step process that predates the whole genome duplication. *PLoS*  
661 *ONE* 8:e68734.
- 662 Hahn MW, De Bie T, Stajich JE, Nguyen C, Cristianini N. 2005. Estimating the tempo and mode  
663 of gene family evolution from comparative genomic data. *Genome Res* 15:1153-1160.
- 664 Hakes L, Pinney JW, Lovell SC, Oliver SG, Robertson DL. 2007. All duplicates are not equal:  
665 the difference between small-scale and genome duplication. *Genome Biol* 8:R209.
- 666 Jorgensen P, Nishikawa JL, Breikreutz B-J, Tyers M. 2002. Systematic identification of  
667 pathways that couple cell growth and division in yeast. *Science* 297:395-400.
- 668 Kaessmann H, Vinckenbosch N, Long M. 2009. RNA-based gene duplication: mechanistic and  
669 evolutionary insights. *Nat Rev Genet* 10:19-31.
- 670 Kellis M, Birren BW, Lander ES. 2004. Proof and evolutionary analysis of ancient genome  
671 duplication in the yeast *Saccharomyces cerevisiae*. *Nature* 428:617-624.

- 672 Kenmochi N, Kawaguchi T, Rozen S, Davis E, Goodman N, Hudson TJ, Tanaka T, Page DC.  
673 1998. A map of 75 human ribosomal protein genes. *Genome Res* 8:509-523.
- 674 Kito H, Abe A, Sujaya IN, Oda Y, Asano K, Sone T. 2009. Molecular characterization of the  
675 relationships among *Amylomyces rouxii*, *Rhizopus oryzae*, and *Rhizopus delemar*. *Biosci*  
676 *Biotechnol Biochem* 73:861-864.
- 677 Kondrashov FA, Kondrashov AS. 2006. Role of selection in fixation of gene duplications. *J*  
678 *Theor Biol* 239:141-151.
- 679 Korobeinikova AV, Garber MB, Gongadze GM. 2012. Ribosomal proteins: structure, function,  
680 and evolution. *Biochemistry (Mosc)* 77:562-574.
- 681 Kriventseva EV, Tegenfeldt F, Petty TJ, Waterhouse RM, Simão FA, Pozdnyakov IA, Ioannidis  
682 P, Zdobnov EM. 2014. OrthoDB v8: update of the hierarchical catalog of orthologs and the  
683 underlying free software. *Nucleic Acids Res* 43:D250-D256.
- 684 Kumar S, Stecher G, Tamura K. 2016. MEGA7: Molecular Evolutionary Genetics Analysis  
685 Version 7.0 for Bigger Datasets. *Mol Biol Evol* 33:1870-1874.
- 686 Kuzumaki T, Tanaka T, Ishikawa K, Ogata K. 1987. Rat ribosomal protein L35a multigene  
687 family: molecular structure and characterization of three L35a-related pseudogenes. *Biochimica*  
688 *et Biophysica Acta (BBA)-Gene Structure and Expression* 909:99-106.
- 689 Li B, Vilardell J, Warner JR. 1996. An RNA structure involved in feedback regulation of splicing  
690 and of translation is critical for biological fitness. *Proceedings of the National Academy of*  
691 *Sciences* 93:1596-1600.
- 692 Li L, Huang Y, Xia X, Sun Z. 2006. Preferential duplication in the sparse part of yeast protein  
693 interaction network. *Mol Biol Evol* 23:2467-2473.
- 694 Li WH, Wu CI, Luo CC. 1985. A new method for estimating synonymous and nonsynonymous  
695 rates of nucleotide substitution considering the relative likelihood of nucleotide and codon  
696 changes. *Mol Biol Evol* 2:150-174.
- 697 Liao D. 1999. Concerted evolution: molecular mechanism and biological implications. *Am J Hum*  
698 *Genet* 64:24-30.
- 699 Lin Z, Kong H, Nei M, Ma H. 2006. Origins and evolution of the *recA/RAD51* gene family:  
700 evidence for ancient gene duplication and endosymbiotic gene transfer. *Proc Natl Acad Sci U S*  
701 *A* 103:10328-10333.
- 702 Lin Z, Li WH. 2011a. The evolution of aerobic fermentation in *Schizosaccharomyces pombe*  
703 was associated with regulatory reprogramming but not nucleosome reorganization. *Mol Biol*  
704 *Evol* 28:1407-1413.
- 705 Lin Z, Li WH. 2011b. Expansion of hexose transporter genes was associated with the evolution  
706 of aerobic fermentation in yeasts. *Mol Biol Evol* 28:131-142.
- 707 Lin Z, Nei M, Ma H. 2007. The origins and early evolution of DNA mismatch repair genes -  
708 Multiple horizontal gene transfers and co-evolution. *Nucleic Acids Res* 35:7591-7603.

- 709 Ma L-J, Ibrahim AS, Skory C, Grabherr MG, Burger G, Butler M, Elias M, Idnurm A, Lang BF,  
710 Sone T. 2009. Genomic analysis of the basal lineage fungus *Rhizopus oryzae* reveals a whole-  
711 genome duplication. *PLoS Genet* 5:e1000549.
- 712 Maguire SL, ÓhÉigeartaigh SS, Byrne KP, Schröder MS, O'Gaora P, Wolfe KH, Butler G. 2013.  
713 Comparative genome analysis and gene finding in *Candida* species using CGOB. *Mol Biol Evol*  
714 30:1281-1291.
- 715 McMillan J, Lu Z, Rodriguez JS, Ahn TH, Lin Z. 2019. YeastTSS: an integrative web database of  
716 yeast transcription start sites. Database (Oxford) 2019.
- 717 Mendoza L, Vilela R, Voelz K, Ibrahim AS, Voigt K, Lee SC. 2014. Human Fungal Pathogens of  
718 Mucorales and Entomophthorales. *Cold Spring Harb Perspect Med* 5.
- 719 Montagne J, Stewart MJ, Stocker H, Hafen E, Kozma SC, Thomas G. 1999. *Drosophila* S6  
720 kinase: a regulator of cell size. *Science* 285:2126-2129.
- 721 Murata M, Nishiyori-Sueki H, Kojima-Ishiyama M, Carninci P, Hayashizaki Y, Itoh M. 2014.  
722 Detecting expressed genes using CAGE. *Methods Mol Biol* 1164:67-85.
- 723 Nakao A, Yoshihama M, Kenmochi N. 2004. RPG: the ribosomal protein gene database.  
724 *Nucleic acids research* 32:D168-D170.
- 725 Nei M, Rooney AP. 2005. Concerted and birth-and-death evolution of multigene families. *Annu*  
726 *Rev Genet* 39:121-152.
- 727 Ohno S. 1970. *Evolution by gene duplication* Berlin, New York: Springer-Verlag.
- 728 Panchy N, Lehti-Shiu M, Shiu SH. 2016. Evolution of Gene Duplication in Plants. *Plant Physiol*  
729 171:2294-2316.
- 730 Papp B, Pal C, Hurst LD. 2003. Dosage sensitivity and the evolution of gene families in yeast.  
731 *Nature* 424:194-197.
- 732 Pérez-Nevado F, Albergaria H, Hogg T, Gírio F. 2006. Cellular death of two non-  
733 *Saccharomyces* wine-related yeasts during mixed fermentations with *Saccharomyces*  
734 *cerevisiae*. *Int J Food Microbiol* 108:336-345.
- 735 Pfeiffer T, Morley A. 2014. An evolutionary perspective on the Crabtree effect. *Frontiers in*  
736 *molecular biosciences* 1:17.
- 737 Pfeiffer T, Schuster S, Bonhoeffer S. 2001. Cooperation and competition in the evolution of  
738 ATP-producing pathways. *Science* 292:504-507.
- 739 Piskur J, Rozpedowska E, Polakova S, Merico A, Compagno C. 2006. How did *Saccharomyces*  
740 evolve to become a good brewer? *Trends Genet* 22:183-186.
- 741 Rajeh A, Lv J, Lin Z. 2018. Heterogeneous rates of genome rearrangement contributed to the  
742 disparity of species richness in Ascomycota. *BMC Genomics* 19:282.



- 743 Rhind N, Chen Z, Yassour M, Thompson DA, Haas BJ, Habib N, Wapinski I, Roy S, Lin MF,  
744 Heiman DI, et al. 2011. Comparative functional genomics of the fission yeasts. *Science*  
745 332:930-936.
- 746 Sanchez-Gracia A, Vieira FG, Rozas J. 2009. Molecular evolution of the major chemosensory  
747 gene families in insects. *Heredity (Edinb)* 103:208-216.
- 748 Schildkraut E, Miller CA, Nickoloff JA. 2006. Transcription of a donor enhances its use during  
749 double-strand break-induced gene conversion in human cells. *Mol Cell Biol* 26:3098-3105.
- 750 Schlotterer C, Tautz D. 1994. Chromosomal homogeneity of *Drosophila* ribosomal DNA arrays  
751 suggests intrachromosomal exchanges drive concerted evolution. *Curr Biol* 4:777-783.
- 752 Scienski K, Fay JC, Conant GC. 2015. Patterns of Gene Conversion in Duplicated Yeast  
753 Histones Suggest Strong Selection on a Coadapted Macromolecular Complex. *Genome Biol*  
754 *Evol* 7:3249-3258.
- 755 Sidow A. 1996. Gene duplications in the evolution of early vertebrates. *Curr Opin Genet*  
756 *Dev* 6:715-722.
- 757 Stamatakis A. 2006. RAxML-VI-HPC: maximum likelihood-based phylogenetic analyses with  
758 thousands of taxa and mixed models. *Bioinformatics* 22:2688-2690.
- 759 Storici F, Bebenek K, Kunkel TA, Gordenin DA, Resnick MA. 2007. RNA-templated DNA repair.  
760 *Nature* 447:338.
- 761 Straathof AJ, van Gulik WM. 2012. Production of fumaric acid by fermentation. *Subcell Biochem*  
762 64:225-240.
- 763 Vander Heiden MG, Cantley LC, Thompson CB. 2009. Understanding the Warburg effect: the  
764 metabolic requirements of cell proliferation. *Science* 324:1029-1033.
- 765 Venters BJ, Pugh BF. 2009. A canonical promoter organization of the transcription machinery  
766 and its regulators in the *Saccharomyces* genome. *Genome Res* 19:360-371.
- 767 Vision TJ, Brown DG, Tanksley SD. 2000. The origins of genomic duplications in *Arabidopsis*.  
768 *Science* 290:2114-2117.
- 769 Warner JR. 1999. The economics of ribosome biosynthesis in yeast. *Trends Biochem Sci*  
770 24:437-440.
- 771 Weng Y-s, Xing D, Clikeman JA, Nickoloff JA. 2000. Transcriptional effects on double-strand  
772 break-induced gene conversion tracts. *Mutation Research/DNA Repair* 461:119-132.
- 773 Williams KM, Liu P, Fay JC. 2015. Evolution of ecological dominance of yeast species in high-  
774 sugar environments. *Evolution* 69:2079-2093.
- 775 Wimberly BT, Brodersen DE, Clemons WM, Morgan-Warren RJ, Carter AP, Vornrhein C,  
776 Hartsch T, Ramakrishnan V. 2000. Structure of the 30S ribosomal subunit. *Nature* 407:327-339.
- 777 Wolfe KH, Shields DC. 1997. Molecular evidence for an ancient duplication of the entire yeast  
778 genome. *Nature* 387:708-712.

- 779 Wool IG. 1979. The structure and function of eukaryotic ribosomes. *Annu Rev Biochem* 48:719-  
780 754.
- 781 Zeng L, Zhang Q, Sun R, Kong H, Zhang N, Ma H. 2014. Resolution of deep angiosperm  
782 phylogeny using conserved nuclear genes and estimates of early divergence times. *Nat*  
783 *Commun* 5:4956.
- 784 Zhang J. 2003. Evolution by gene duplication: an update. *Trends in Ecology & Evolution* 18:292-  
785 298.
- 786 Zhang J. 2013. Gene duplication. In: Losos J, editor. *The Princeton Guide to Evolution*.  
787 Princeton, New Jersey 08540 USA: Princeton University Press. p. 397-405.
- 788 Zhang J, Yang JR. 2015. Determinants of the rate of protein sequence evolution. *Nat Rev*  
789 *Genet* 16:409-420.  
790

791 **Figure Legends:**

792 **Figure 1: Schematic illustration of gene duplication patterns of 79 RP families in 34**  
793 **fungal species.** Each row represents a fungal species, and each column represents an RP  
794 gene family. The colors of a cell represent the numbers of gene copies identified in an RP family  
795 of a species. The evolutionary relationship for 34 species, inferred based on amino acid  
796 sequences of RNA polymerase II were shown to the left side of the matrix. The species names  
797 were provided to the right of the matrix.

798  
799 **Figure 2: Phylogenetic trees of representative RP gene families.** Phylogenetic trees of the  
800 RPS6 gene family (A) and the RPS19 (B) gene family in 34 fungal species. The phylogenetic  
801 trees were inferred by maximum likelihood (ML) method with 100 bootstrap tests. Only  
802 bootstrap values above 50 are shown next to each node. The branches of budding yeast, fission  
803 yeast, and Mucoromycota species are colored in red, blue and green respectively. The full  
804 species names in taxa were provided in Supplementary table 2.

805  
806 **Figure 3: Major types of tree topologies observed from 55 RP families with duplicates in**  
807 **the budding yeasts. (A)** Phylogenetic relationships of RPL12 genes from five representative  
808 budding yeast species. In this case, the two copies of RPL12 genes in *S. cerevisiae* for a  
809 species-specific clade. 21 RP gene families demonstrate similar tree topology, as indicated by  
810 number “21” in a yellow dot; (B) Phylogenetic relationships of RPL11 genes. The two copies of  
811 RPL11 genes in *S. cerevisiae* and *S. mikatae* form a well-supported clade, and the orthologous  
812 genes between *S. cerevisiae* and *S. mikatae* are more closely related to each other. Seven RP  
813 gene families have a similar tree topology; (C) Phylogenetic relationships of RPL16 genes. Each  
814 of RPL16 duplicate genes in *S. cerevisiae* is more closely related to their orthologous genes in  
815 *S. mikatae* and *S. eubayanus*. 24 RP gene families share a similar tree topology; (D)  
816 Phylogenetic relationships of RPP1 genes. Each of RPP1 duplicate genes in *S. cerevisiae*  
817 is more closely related to their orthologous genes in the five WGD species. Seven RP gene  
818 families demonstrate a similar tree topology. (E) The distribution of RP families with different  
819 termination points of concerted evolution based on evolutionary relationships of RP duplicate  
820 genes in *S. cerevisiae*. The numbers on each tree branch represent the numbers of RP families  
821 that have terminated concerted evolution at the indicated evolutionary stages.

822 **Figure 4: The origin and evolution of RP genes in the fission yeasts. (A)** A schematic  
823 illustration of microsynteny structures of RPL11 genes in four budding yeasts. The microsynteny  
824 blocks of RPL11A are shared by all fission yeasts, so are the RPL11 genes, supporting that the  
825 duplication of RPL11 occurred prior to the divergence of the fission yeasts. The number in each  
826 box represents its orthologous group ID. (B) Phylogenetic relationships of RPL11 genes in four  
827 fission yeast species. The RPL11 duplicate genes in *Sch. pombe* are more closely related to  
828 each other than to any orthologous genes. 45 RP gene families demonstrate similar tree  
829 topology; (C) Phylogenetic relationships of RPS17 genes. Each of RPL17 duplicate genes in  
830 *Sch. pombe* are more closely related to their orthologous genes in *Sch. octosporus* and *Sch.*  
831 *cryophilus*. Nine RP gene families demonstrate similar tree topology; (D) Phylogenetic  
832 relationships of RPS5 genes. Each copy of RPS5 duplicates in *Sch. pombe* are more closely  
833 related to their orthologous genes. Four RP gene families demonstrate similar tree topology. (E)  
834 The distribution of RP families with different termination points of concerted evolution in *Sch.*  
835 *pombe*. The numbers on each tree branch indicate the numbers of RP families that have  
836 terminated concerted evolution at the indicated evolutionary stages.

837 **Figure 5: The origin and evolution of RP genes in pin molds.** (A) A schematic illustration of  
838 microsynteny structures of RPL3 genes in three pin molds. The shared microsynteny structure  
839 suggested that the first duplication event of RPL3 genes have occurred prior to the divergence  
840 of the pin molds species. The two RPL3 genes have experienced a second round of duplication  
841 by WGD in *R. delemar*. (B) Phylogenetic relationships of RPL3 genes in three pin molds. The  
842 RPL3 paralogous genes in *R. microsporus* are more closely related to each other than to any  
843 orthologous genes. 57 RP gene families demonstrate similar tree topology; (C) Phylogenetic  
844 relationships of RPL38 genes in Mucorales. Each of RPL38 duplicate genes in *R. microsporus*  
845 is more closely related to their orthologous genes in *R. delemar*. 17 RP gene families  
846 demonstrate similar tree topology; (D) Phylogenetic relationships of RPS20 genes in three pin  
847 molds. Each RPS20 duplicate gene in *R. microsporus* is more closely related to their  
848 orthologous genes. Two RP gene families demonstrate similar tree topology. (E) The  
849 distribution of RP families with different termination points of concerted evolution during the  
850 evolution of *R. microsporus*. The numbers on each tree branch represent the estimated  
851 numbers of RP families that have terminated concerted evolution at the indicated evolutionary  
852 stage.

853  
854 **Figure 6: Distinct mutations rates in substitution sites and introns between RP**  
855 **paralogous genes.** The distributions of mutation rates in intron and synonymous sites between  
856 RP paralogous genes in *S. cerevisiae* (A), *Sch. pombe* (B) and *R. microspores* (C). Scatter plots  
857 of mutation rates in intron against synonymous sites between RP paralogous genes in in *S.*  
858 *cerevisiae* (D), *Sch. pombe* (E) and *R. microspores* (F).

859

860 **Figure 7: RP gene copy numbers are positively correlated with RP transcription**  
861 **abundance, ethanol production ability, and glucose consumption rates.** (A) A scatter plot  
862 between the RP copy number and total RP transcription abundance in 11 yeast species. (B) A  
863 scatter plot between the RP copy number and ethanol production efficiency in 19 yeast species.  
864 (C) A scatter plot between the RP copy number and glucose consumption rate in 19 yeast  
865 species.

866

867 **Supplementary Figures:**

868 **Supplementary fig. 1: The phylogenetic relationships of 34 representative fungal species.**

869 The phylogenetic tree was inferred based on amino acid sequences of RPA polymerase II using  
870 ML method by RAxML with 100 bootstrap replicates.

871 **Supplementary fig. 2: The total transcription abundance of RP genes is positively**

872 **correlated with ethanol production efficiency and glucose consumption rates.** (A) A

873 scatter plot between total RP transcription abundance and ethanol production efficiency in 9

874 yeast species. (B) A scatter plot between the total RP transcription abundance and glucose

875 consumption rate in 9 yeast species.

876 **Supplementary Tables:**

877 Table S1: List of numbers of RP genes identified in 285 fungal species

878 Table S2: List of numbers of RP gene identified in 34 representative fungal species based on  
879 manual curation.

880 Table S3: List of RP genes identified in 34 representative fungal species

881 Table S4: List of orthologous groups identified in four fission yeasts

882 Table S5: Microsynteny data of the 79 RP families in fission yeasts

883 Table S6: Statistics of intron number in RP genes in *S. cerevisiae* and *Sch. pombe*.

884 Table S7. Number of share homologous genes between microsynteny blocks near the RP  
885 paralogous genes in three Mucorales species

886 Table S8. Number of share homologous genes between microsynteny blocks near the RP  
887 orthologous genes in three Mucorales species

888 Table S9: Mutation rates of synonymous sites and intron in *S. cerevisiae*, *Sch. pombe* and *R.*  
889 *microspores*

890 Table S10: Transcription abundance of RP genes in 11 species based on CAGE data

891

892 **Supplementary Files:**

893

894 Supplementary File 1: Phylogenetic trees of RP families from the 34 representatives fungal  
895 species.

896 Supplementary File 2: Phylogenetic trees of RP families in the five WGD budding yeast species.

897 Supplementary File 3: Phylogenetic trees of RP families in the four fission yeast species.

898 Supplementary File 4: Phylogenetic trees of RP families in the four Mucoromycotina species.

899

900

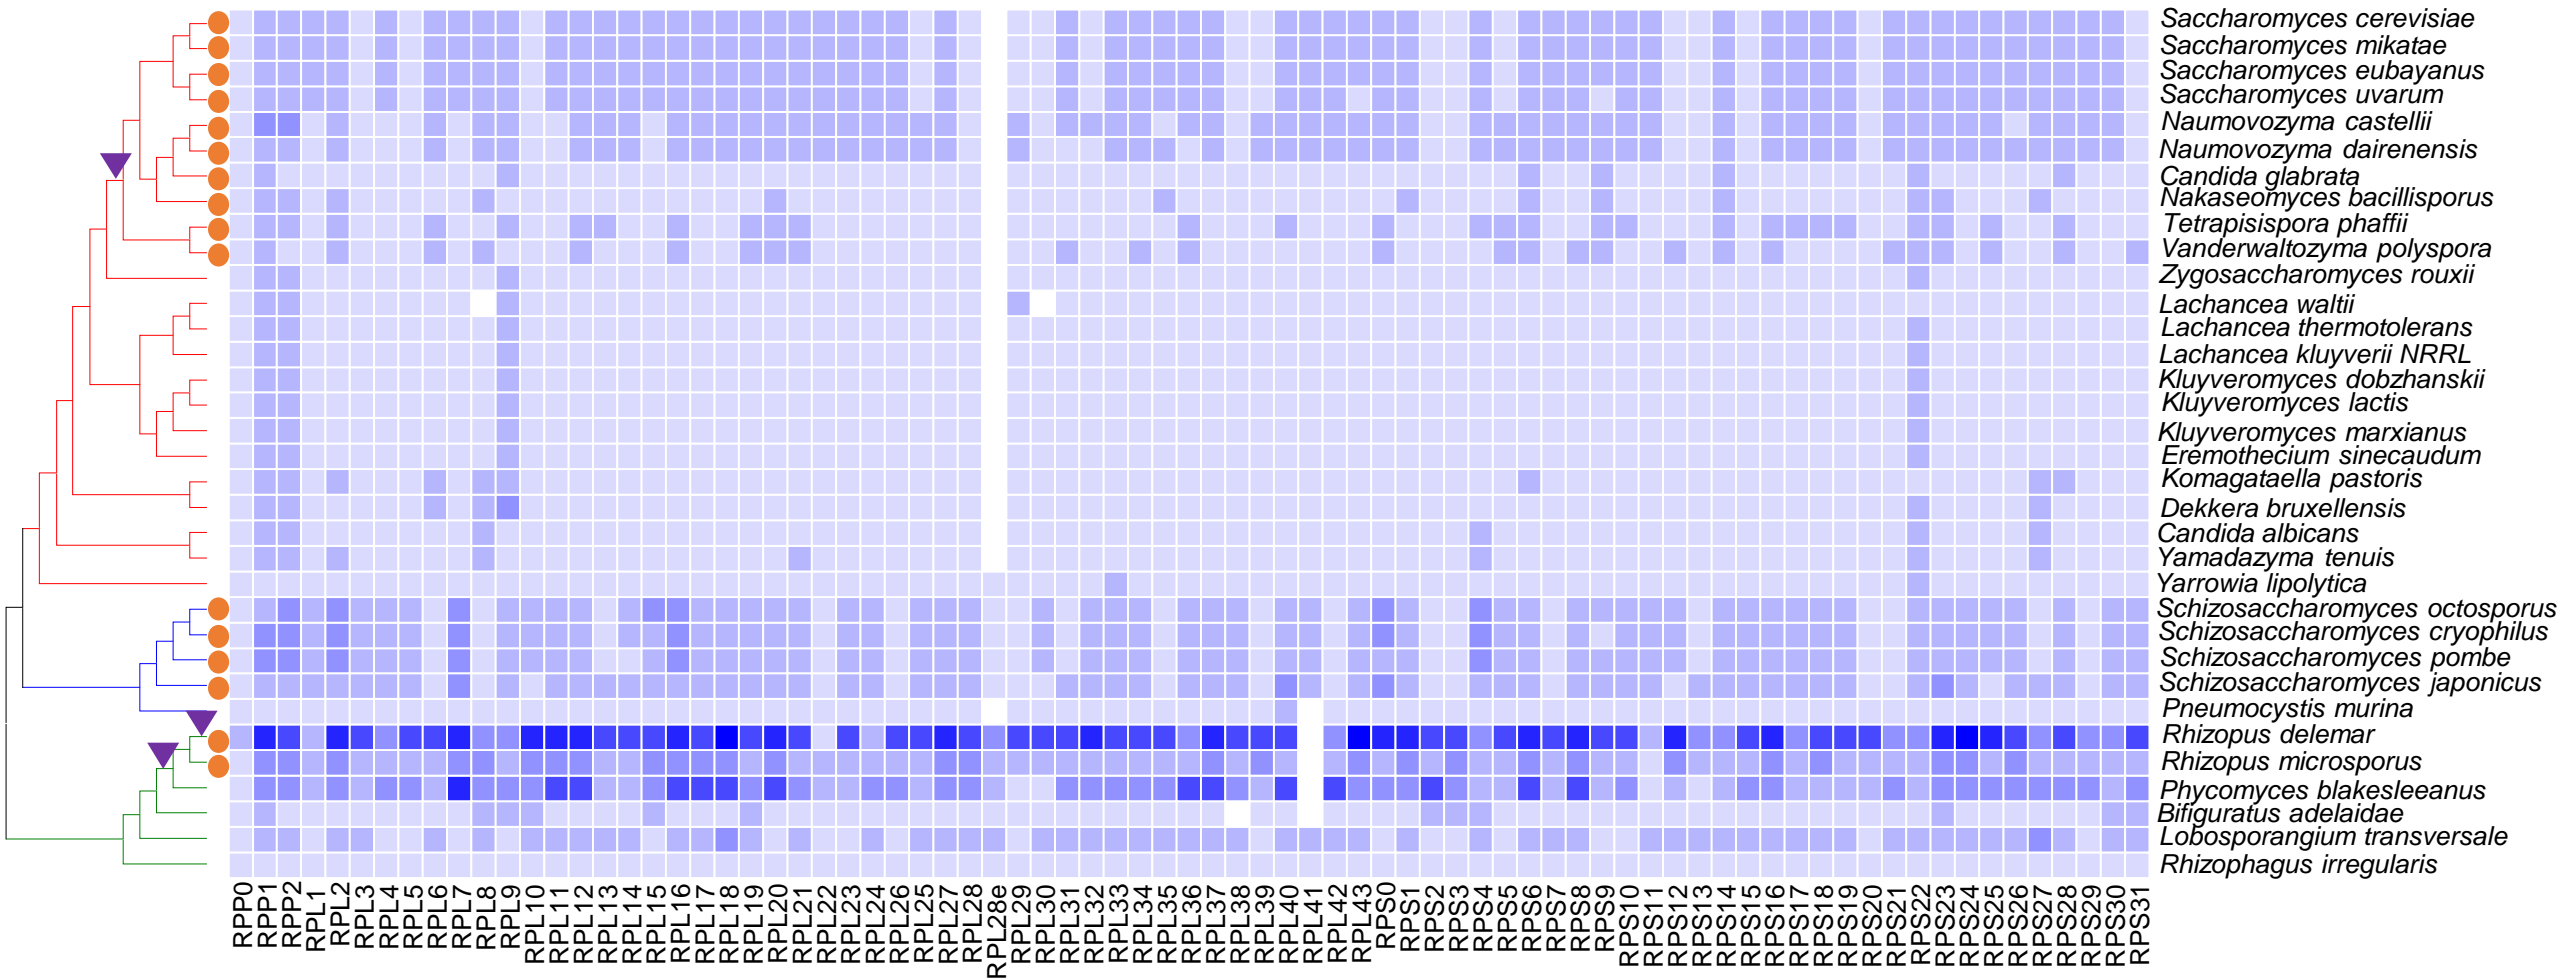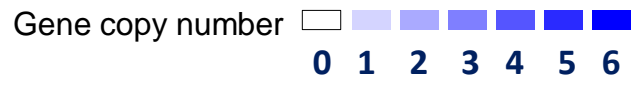

▼ Whole genome duplication

● Fermentative lifestyle

Fig. 2

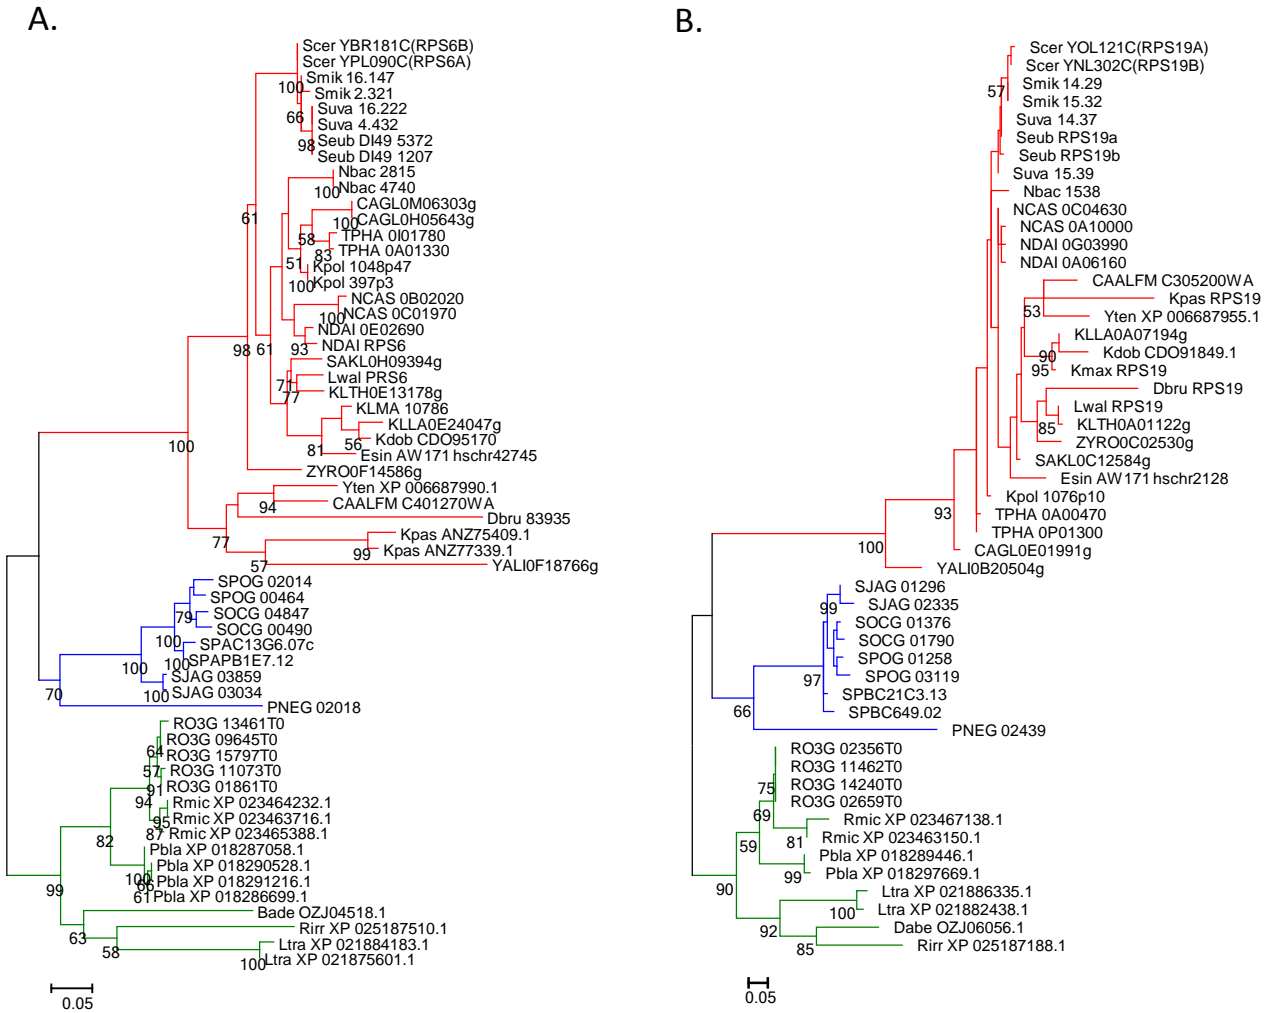

Fig. 3

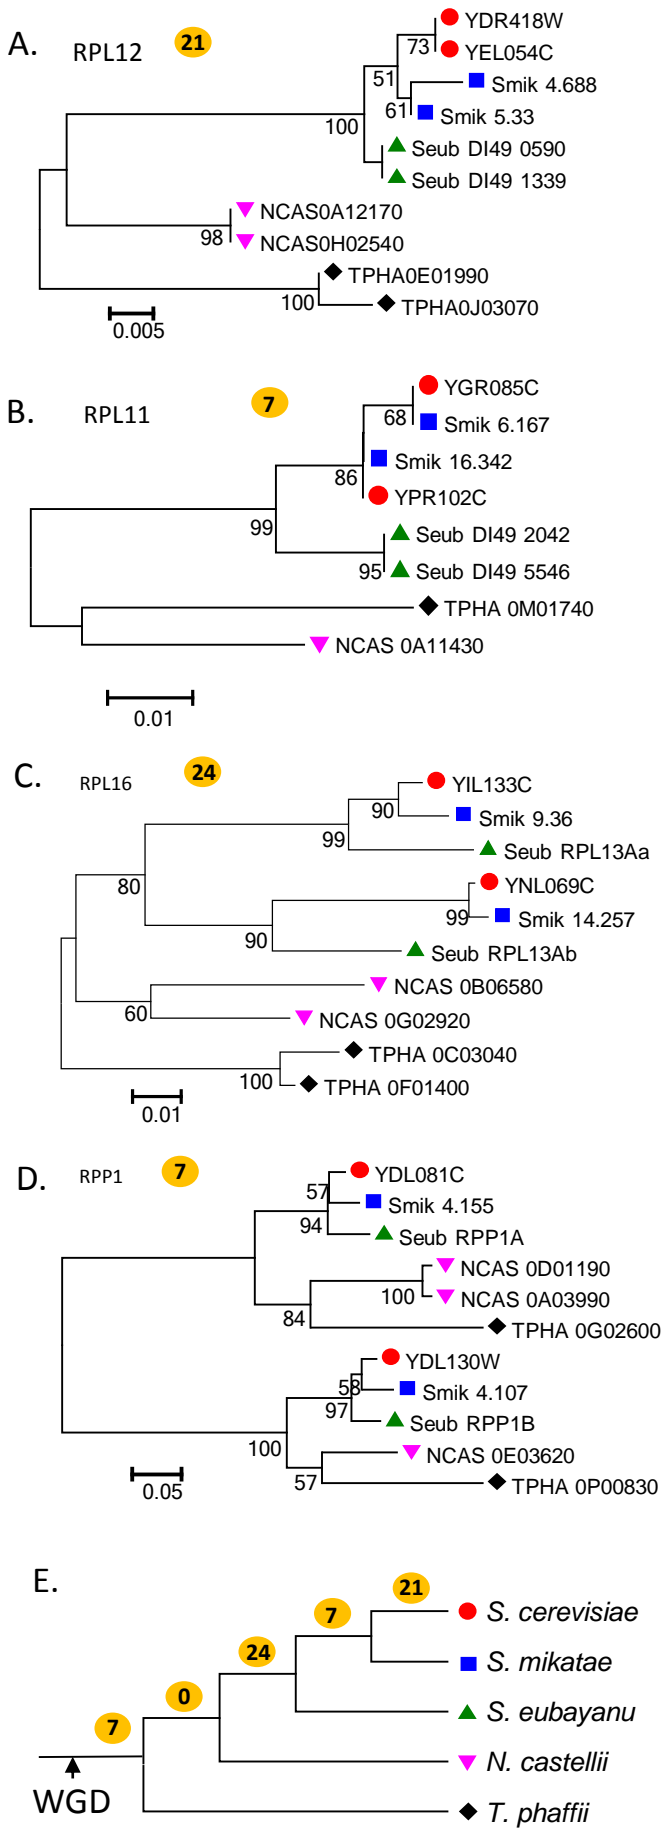



Fig. 4

A.

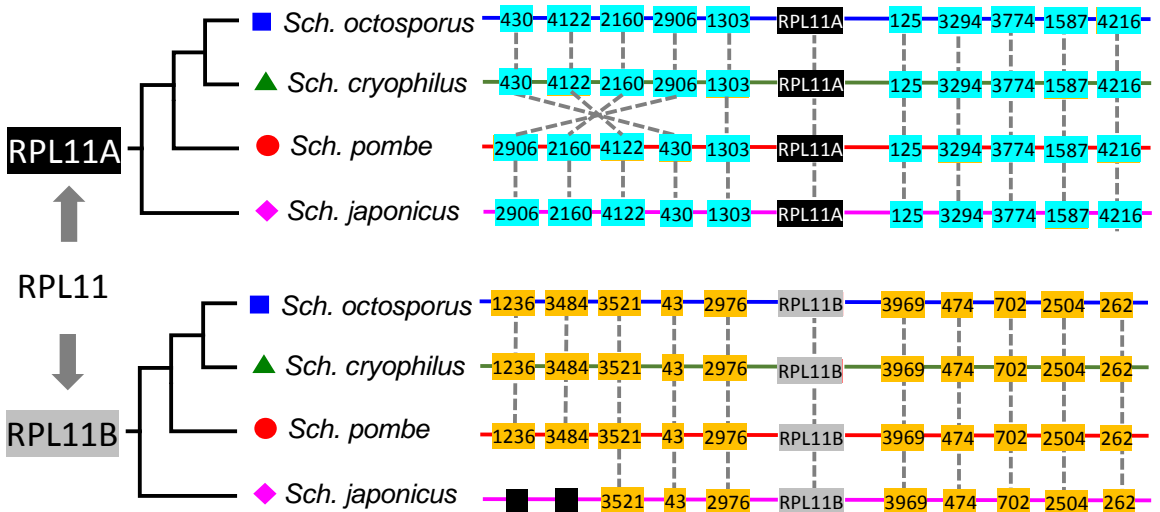

B.

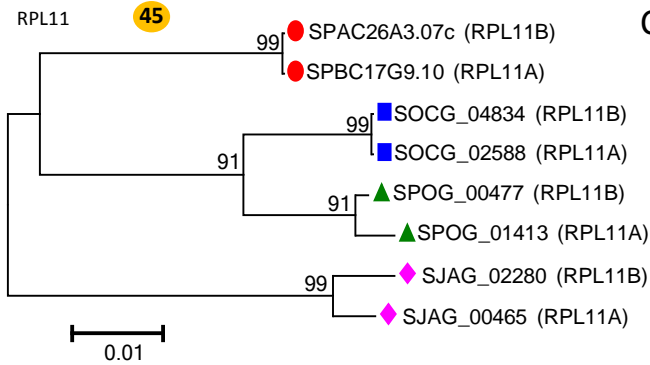

C.

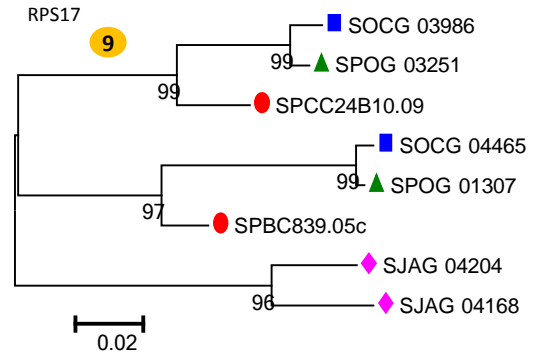

D.

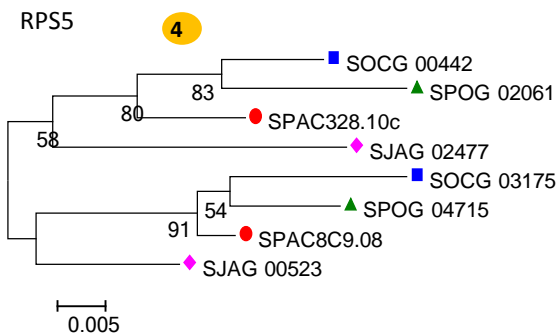

E.

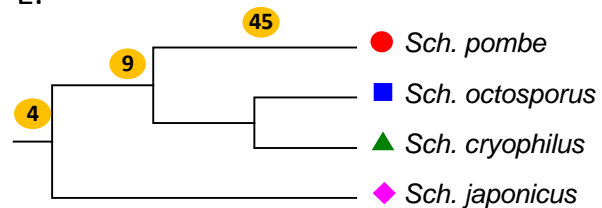

Fig. 5

A.

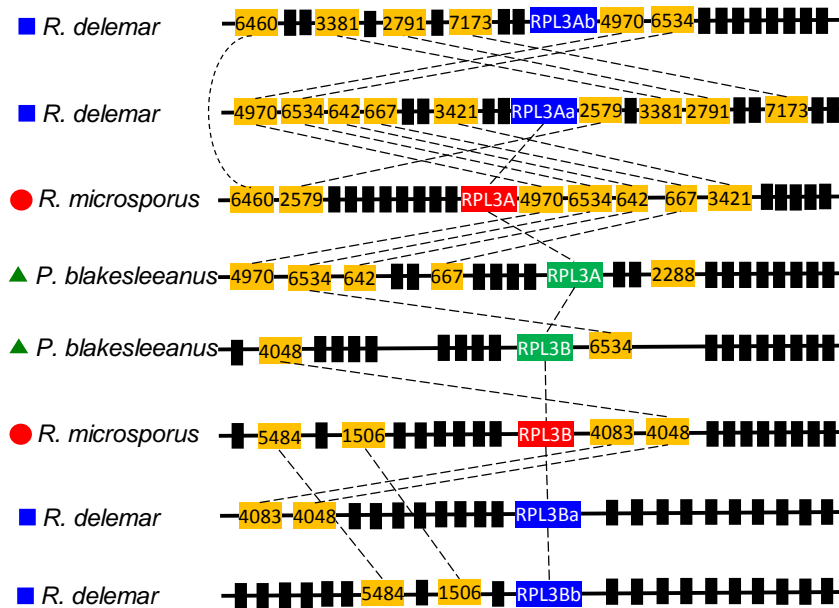

B.

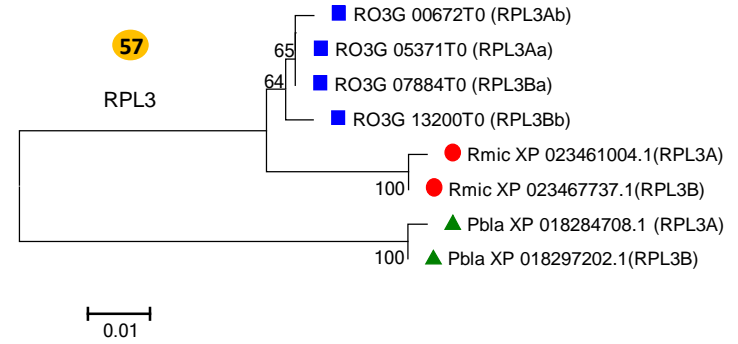

C.

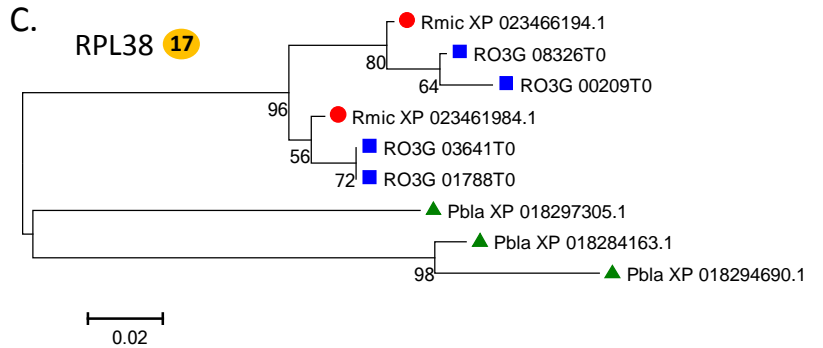

D.

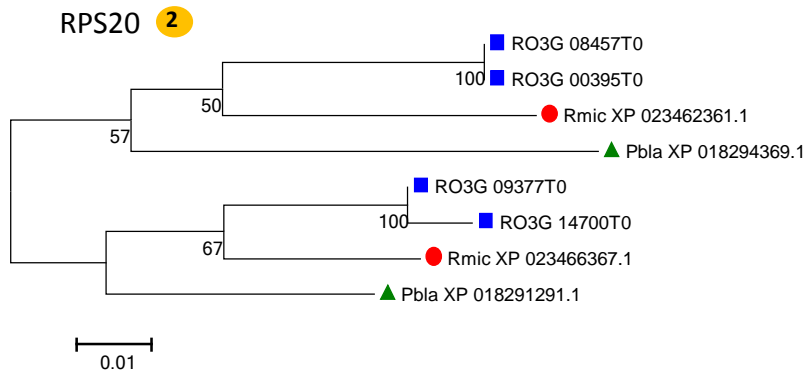

E.

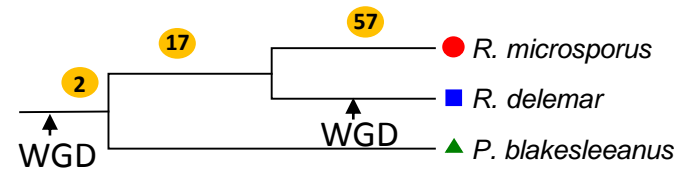

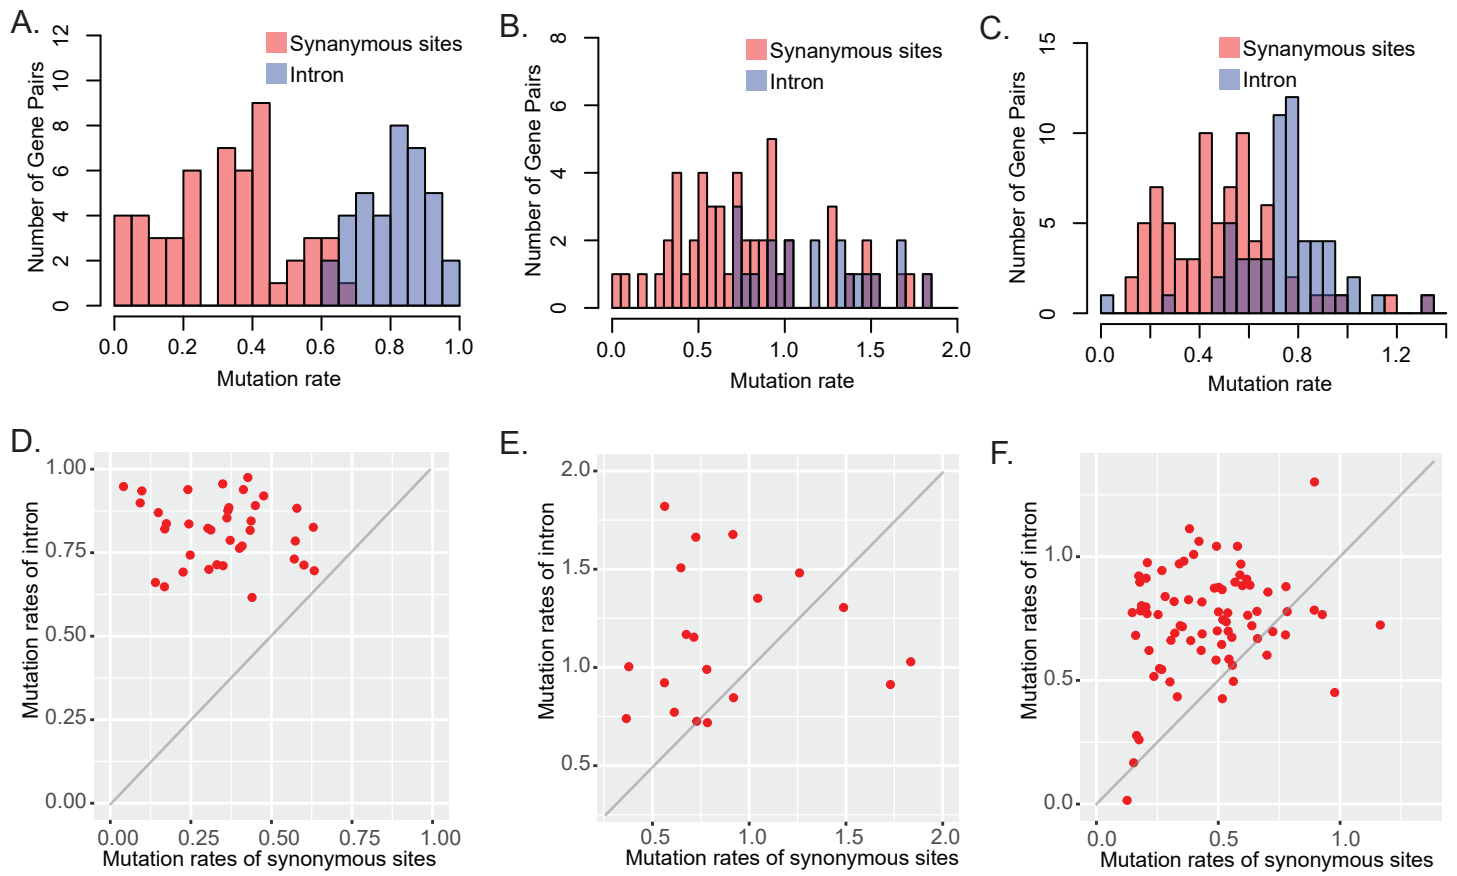

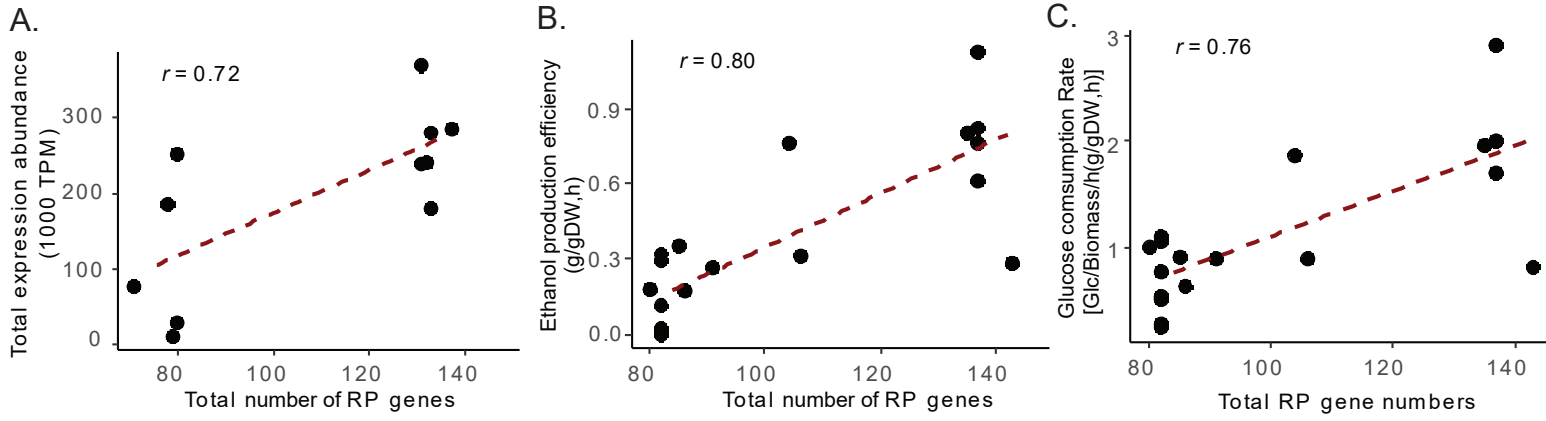

Source: https://www.biorxiv.org/content/10.1101/751792v1.full.pdf
